1      Global Burden of Disease worldwide statistical analysis  
2      of risk factors impacting noncommunicable disease deaths  
3                      compared with assessments by systematic  
4                                      literature reviews

5  
6      David K Cundiff (0000-0002-3206-9665), independent researcher,<sup>1 3</sup> Chunyi Wu (0000-0002-  
7      2186-3433), Research Epidemiologist/Statistician<sup>2 3</sup>

8      <sup>1</sup> Long Beach, California, USA

9      <sup>2</sup> Area Specialist Lead in Epidemiology and Statistics, Michigan Medicine, Ann Arbor,  
10     Michigan, USA

11     <sup>3</sup> Volunteer collaborators with the Institute of Health Metrics and Evaluation, Seattle,  
12     Washington, USA

13     Correspondence to: David K Cundiff [davidkcundiff@gmail.com](mailto:davidkcundiff@gmail.com) Phone: 01-562-438-8805

14     Word count: abstract=501, text=4799

15

16 **Abstract**

17 **Background** Based on systematic literature reviews, the Institute of Health Metrics and  
18 Evaluation (IHME) Global Burden of Disease (GBD) landmark risk factor paper attributes about  
19 8 million noncommunicable diseases deaths/year to a composite of 15 dietary risk factors.  
20 Another 27 million noncommunicable deaths out of 56.5 million total deaths worldwide are  
21 attributed to high levels of metabolic risk factors.

22 **Methods** We format and population weight IHME GBD worldwide data resulting in 7886 rows  
23 of data from cohorts of about 1 million people each representing about 7.8 billion people in  
24 2020. Noncommunicable disease deaths/100k/year (NCD) are correlated with the four metabolic  
25 risk factors, 15 dietary risk factors, six dietary covariates, and the composite “dietary risks”  
26 variable. We compare NCD groups of cohorts (about 1000 cohorts, representing about 1 billion  
27 people) with the lowest and highest NCD and the same for body mass index (BMI). We compare  
28 literature reviews attributions of NCD causation with findings from the GBD data in assessing  
29 the impact of dietary and metabolic risk factors on NCD.

30  
31 **Findings** Literature review derived dietary risks composite risk factor correlated with NCD  
32 account for 1.9% of worldwide NCD. Using GBD data to compare groups with the lowest versus  
33 the highest rates of NCD: the lowest NCD 990 cohorts average 923.8 NCD and consume 320.4  
34 kcal/day from six animal foods. The highest NCD 1054 cohorts average 2064 NCD and on  
35 average and consume 117.2 kcal/day of six animal foods. Vitamin A deficiency in children is 75%  
36 higher in children in the high NCD cohorts. Evaluating high BMI cohorts, 973 cohorts with  
37  $BMI \geq 25$  account for 10.5% of the worldwide NCD. These high BMI cohorts also have higher

38 than average fasting plasma glucose (FPG: FPG mean=4.71 versus FPG mean=4.25) and low  
39 density lipoprotein cholesterol (LDLC: LDLC mean=2.79 versus LDLC mean=2.30).

40

41 **Interpretation** The evidence basis of the dietary risks composite risk factor, accounting for only  
42 1.9% of NCD worldwide should be questioned. Systematic literature reviews based versus GBD  
43 data based estimates of metabolic and dietary risk factor impacts on NCD vary markedly.

44 Systematic literature reviews of studies involving individual subjects are better at ascertaining  
45 the impact on NCD of obesity, hyperglycemia, high LDLC, and hypertension. High levels of  
46 metabolic risk factors cannot be analysed with GBD data giving only the mean values for NCD  
47 and risk factors. Since high mean BMI cohorts (mean BMI $\geq$ 25) account for only 10.5% of  
48 worldwide NCD, literature reviews appear to overestimate the worldwide impacts of high  
49 metabolic risk factors on NCD (i.e., accounting for nearly 50% of worldwide deaths: 27  
50 million/56.5 million worldwide deaths). High NCD, including cardiovascular disease deaths,  
51 associated with low animal food intake suggests that fat soluble vitamin deficiencies (vitamins  
52 A, D, E and K<sub>2</sub>, all largely from animal foods that also supply fatty acids for gut absorption)  
53 may partly account for high rates of NCD worldwide, especially in developing countries.

54 Literature review based and GBD raw data based approaches should be complementary in  
55 assessing dietary and other attributable risks for NCD and other individual health outcomes.

56 **Funding:** None

57

58 **Research in context**

59 **Evidence before this study**

60 The Global Burden of Diseases, Injuries, and Risk Factors Study (GBD 2019) provides the most  
61 recent assessment of deaths, attributable to metabolic, environmental and occupational, and  
62 behavioural risk factors. Controversies abound in the field of nutritional epidemiology. The lipid  
63 hypothesis that dietary saturated fat and cholesterol promote cardiovascular diseases has been  
64 disputed with no scientific consensus on the outcome.

65

66 **Added value of this study**

67  
68 This study assesses the evidence basis of deaths attributed to dietary risks and metabolic risk  
69 factors derived from systematic reviews of the medical literature in GBD 2019. This study uses  
70 GBD raw data formatted and population weighted to assess the worldwide deaths from  
71 noncommunicable diseases attributable to dietary and metabolic risk factors. With this GBD data  
72 analysis methodology, the levels of 20 dietary risk factors are assessed in cohorts with the  
73 highest and lowest rates of noncommunicable disease deaths. Worldwide GBD data show that  
74 many deaths are associated with low levels of animal foods and saturated fatty acids (kcal/day  
75 percapita) and associated with low levels of metabolic risk factors. These findings are at variance  
76 with the lipid hypothesis operating uniformly worldwide. In the UK, USA, Mexico, and Japan,  
77 with subnational GBD data, many deaths are attributable to high levels of animal foods, saturated  
78 fatty acids, and metabolic risk factors, supporting the lipid hypothesis.

79

80

81

## 82 **Implications of all the available evidence**

83 The findings of systematic literature reviews in assessing the health impacts of high metabolic  
84 risk factors are superior than using GBD data analysis because GBD data only assess mean  
85 cohort levels of metabolic risk factors. However, GBD data can show effects of dietary risk  
86 factors acting directly and mediating metabolic risks leading to noncommunicable disease  
87 deaths. This GBD data based methodology can enhance understanding of the complex  
88 interrelationships of diet, metabolic risk factors and noncommunicable disease deaths. The  
89 findings are consistent with a “fat soluble vitamin hypothesis” that deficiencies of vitamins A, D,  
90 E, and K2 and fatty acids from inadequate animal food consumption lead to increased  
91 cardiovascular disease and noncommunicable disease deaths.

92

## 93 **Introduction**

94 Institute of Health Metrics and Evaluation (IHME) Global Burden of Disease (GBD) researchers  
95 attribute about 8 million deaths/year worldwide to poor diet quality out of a total of about 56.5  
96 million deaths a year worldwide.<sup>1</sup> GBD investigators ascribe high body mass index ( $BMI \geq 25$ ) to  
97 poor “diet quality,” excessive caloric intake, and low physical activity. Diet quality is defined as,  
98 “the dietary risks that are based on the joint effects of 15 diet quality components.” Each dietary  
99 risk factor has an optimal range or theoretical minimum risk exposure level range (TMREL  
100 range in g/day) to consume based on systematic reviews of the literature. “Dietary risks” is a  
101 composite metric including harmful risk factors: (1) high processed meat (TMREL=0), (2) high  
102 red meat (TMREL=0), (3) high sugary beverages (TMREL=Any intake in g/day of  
103 beverages with  $\geq 50$  kcal per 226.8 gram serving), (4) high trans fatty acids (TMREL=0),  
104 and (5) high sodium (TMREL=average 24-hour urinary sodium excretion of 1-5 g/day)  
105 and protective risk factors: (6) low milk (TMREL=90-100 g/day), (7) low omega-3 fatty acids  
106 (TMREL= 430-470 milligrams of eicosapentaenoic acid (EPA) and docosahexaenoic  
107 acid (DHA)), (8) low fruits (TMREL= 310-340 grams/day), (9) low vegetables (TMREL=  
108 280-320 grams/day), (10) low nuts and seeds (TMREL= 10-19 grams/day) (11) low  
109 legumes TMREL= 90-100 g/day, (12) low whole grains (TMREL= 140-160 g/day), (13) low  
110 calcium (TMREL=1.06 – 1.11 g/day), (14) low fibre (21-22 g/day), and low (15)  
111 polyunsaturated fatty acids (TMREL= 7-9% total energy intake).

112  
113 GBD researchers ascribe another 27 million noncommunicable disease deaths to high levels of  
114 metabolic risk factors high BMI, high fasting plasma glucose (FPG), high low density  
115 lipoprotein cholesterol (LDL-C), and high systolic blood pressure (SBP)). Low levels of these

116 metabolic risk factors are not also included as risk factors for NCD. For example, while the  
117 TMREL for BMI is 20 - 25 kg/M<sup>2</sup>, no population attributable risk for BMI < 20 is reported.<sup>1</sup>

118

119 This paper will use population weighted, formatted worldwide GBD data to begin to assess the  
120 impact of dietary and metabolic risk factors on noncommunicable disease deaths/100k/year  
121 (NCD). Findings will be compared with those derived from systematic literature reviews.

122

123

## 124 **Methods**

125 As volunteer collaborators with the IHME, we utilise raw GBD ecological data ( $\approx 1.4$  Gigabytes)  
126 on NCD, metabolic risk factors, dietary risk factors and covariates, and other risk factors of male  
127 and female cohorts 15-49 years old and 50-69 years old from each year 1990-2017 from 195  
128 countries and 365 subnational locations ( $n=1120$  cohorts). We also use 2019 GBD data on the  
129 dietary risks composite metric correlated with NCD. To maximally utilise the available GBD  
130 data, we average the values for ages 15-49 years old together with 50-69 years old for NCD and  
131 each risk factor exposure for each male and female cohort for each year. Finally, for each male  
132 and female cohort, data from all 28 years (1990-2017) on mean NCD and on each of the risk  
133 factor exposures are averaged using the computer software program R.

134  
135 Food risk factors come as g/day consumed percapita. GBD dietary covariate data originally come  
136 from Food and Agriculture Organization surveys of animal and plant food commodities available  
137 percapita in countries worldwide—as opposed to consumed per capita.<sup>2</sup> Supplementary Table 1  
138 lists the relevant GBD risk factors, covariates, and other available variables with definitions of  
139 those risk factor exposures.<sup>3</sup>

140  
141 GBD worldwide citations of over 12,000 surveys constituting ecological data inputs for this  
142 analysis are available online from IHME.<sup>2</sup> The main characteristics of IHME GBD data sources,  
143 the protocol for the GBD study, and all risk factor values have been published by IHME GBD  
144 data researchers and discussed elsewhere.<sup>4-7</sup> These include detailed descriptions of categories of  
145 input data, potentially important biases, and methodologies of analysis. We do not clean or pre-  
146 process any of the GBD data. GBD cohort risk factor and NCD data from the IHME have no



147 missing records. Because the GBD data for the study come from IHME, no ethics committee  
148 approval or institutional review board review is needed for this post hoc statistical analysis. The  
149 updated 2019 raw data with all the variables from the GBD 2017 data we use for this analysis  
150 may be obtained by volunteer researchers collaborating with IHME.<sup>8</sup>

151  
152 To weigh the country and subnational data according to population, internet searches (mostly  
153 Wikipedia) yields the most recent population estimates for countries and subnational states,  
154 provinces, and regions. The 1120 GBD cohorts available are population weighted by a software  
155 program in R into an analysis dataset with 7886 population weighted cohorts representing about  
156 7.8 billion people in 2020. Each male or female cohort in the population-weighted analysis  
157 dataset represents approximately 1 million people (range: < 100,000 to 1.5 million). For  
158 example, India with about 1.234 billion people has 617 rows of the same data for males and 617  
159 rows for females. Maldives, with about 445,000 people, has a single row of data for males and  
160 another for females. Without population-weighting the data, cohorts in India and Maldives each  
161 would have had one row for males and one row for females in the analysis dataset, invalidating  
162 the analysis results. World population data from the World Bank or the Organisation for  
163 Economic Co-operation and Development could not be used because they do not include all 195  
164 countries or any subnational data.

165  
166 This report follows the STrengthening the Reporting of OBservational studies in Epidemiology  
167 (STROBE) guidelines for reporting global health estimates.<sup>9</sup>

168

169 Supplementary Table 2 details how omega-3 fatty acid g/day is converted to fish g/day using  
170 data on the omega-3 fatty acid content of frequently eaten fish from the National Institutes of  
171 Health Office of Dietary Supplements (USA).<sup>10</sup> As shown in Supplementary Table 3, we convert  
172 all of the animal and plant food data, including alcohol and sugary beverage consumption, from  
173 g/day to kcal/day. For the g to kcal conversions, we use the Nutritionix track app,<sup>11</sup> which tracks  
174 types and quantities of foods consumed. Saturated fatty acids risk factor (0-1 portion of the entire  
175 diet) is not available with GBD data from 2017, so GBD saturated fatty acids risk factor data  
176 from GBD 2016 is used. Polyunsaturated fatty acid and trans fatty acid GBD risk factor data  
177 from 2017 (0-1 portion of the entire diet) are also utilised. These fatty acid data expressed as 0-1  
178 portion of the entire diet are converted to kcal/day by multiplying by the kcal/day available for  
179 each cohort.

180  
181 The principle outcome variable is noncommunicable disease deaths/100k/year (NCD). NCD is a  
182 combination variable consisting of the deaths/100k/year of over 100 diseases including cancers,  
183 diabetes, and diseases of the cardiovascular, respiratory, hepatic, renal, and central nervous  
184 system.

185

## 186 **Statistical methods**

187 To determine the strengths of the risk factor correlations with mean NCD of population weighted  
188 worldwide cohorts (7886 cohorts) or subgroups of cohorts (e.g., highest NCD and lowest NCD  
189 cohorts, etc.), we utilise Pearson correlation coefficients:  $r$ , 95% confidence intervals (95% CIs),  
190 and  $p$  values. The subgroup of worldwide data for a sensitivity analysis is the subnational data  
191 from the UK, USA, Mexico, and Japan ( $n=730$  cohorts). As with the worldwide data analysis,

192 we report NCD correlating with risk factors and NCD trend correlating with risk factor trends for  
193 this subgroup.

194

195 We use SAS and SAS Studio statistical software 9.4 (SAS Institute, Cary, NC) for the data  
196 analysis.

## 197 **Results**

198 Table 1 shows that the dietary risks composite risk factor correlated with NCD determined that  
199 27.1 / 1426 (1.9%) of worldwide NCD are attributable to dietary risks. The dietary risks  
200 composite risk factor is moderately strongly correlated with NCD ( $r=0.390$ , 95% CI: 0.371 to  
201 0.408,  $p<0.0001$ ). In comparison with the worldwide findings, the USA dietary risks related to  
202 NCD is higher while the total NCD is lower, giving much higher percentages of NCD from  
203 dietary risks (3.62%: 42.90 dietary risks related NCD / 1184 total NCD=0.0362). The correlation  
204 of the dietary risks composite with NCD is very strong compared with worldwide and the other  
205 regions in this table ( $r=0.937$ , 95% CI: 0.924 to 0.948,  $p<0.0001$ ).

206

207 While the USA and the UK have similar rates of NCD (NCD=1184 and 1195, respectively), the  
208 USA has more than threefold more the dietary risks composite risk factor related to NCD (42.90  
209 /13.06=3.27).

210

211 As noted in the IHME GBD risk factors landmark article, the African Sahel region has the lowest  
212 level of the dietary risks composite related disability adjusted life years (DALYs) in the world.  
213 However, the African Sahel has above the worldwide average number of NCD (1580 versus  
214 1426 worldwide). The GBD risk factors landmark article noted Central and Eastern Europe as  
215 having among the highest DALYs in the world. However, the range of total NCD in the African  
216 Sahel (1115-3229) largely overlaps the range of total NCD in Central and Eastern Europe (875-  
217 3193).

218

219 Table 2a shows worldwide NCD correlated with metabolic risk factors. Mean BMI, mean FPG,  
220 and mean LDL-C all negatively correlate with NCD ( $r=-0.308$ , 95% CI: -0.328 to -0.288,  
221  $p<0.0001$ ,  $r=-0.141$ , 95% CI: -0.163 to -0.119,  $p<0.0001$ ,  $r=-0.341$ , 95% CI: -0.360 to -0.321,  
222  $p<0.0001$ , respectively). Only mean SBP worldwide positively correlates with NCD ( $r=-0.068$ ,  
223 95% CI: 0.046 to 0.090,  $p<0.0001$ ). On the other hand, Table 2b shows that the literature review  
224 derived composite dietary risks related to NCD are positively correlated with all four metabolic  
225 risk factors.

226

227 Table 3 compares the NCD in cohorts with the lowest mean BMI (n=952 cohorts) with the NCD  
228 in the cohorts with the highest mean BMI (n=987 cohorts). The NCD is much higher in the low  
229 BMI cohorts (mean NCD in low BMI cohorts=1821 versus mean NCD in high BMI cohorts  
230 1207). The low BMI group with high NCD had a small fraction of the animal food kcal/day of  
231 the high BMI group (low BMI six animal foods: 39.32 kcal/day versus high BMI six animal  
232 foods: 367.2) and much less intake of fatty acids (169.3 versus 492.9 kcal/day).

233

234 Table 4 compares cohorts with the lowest and highest rates of NCD—each group with about  
235 1000 cohorts. The male and female NCD are averaged for each location because of the  
236 substantial differences in NCD between male and female cohorts. The mean animal food intake  
237 in the low NCD cohorts (animal foods=320.4 kcal/day) is over twice the worldwide average  
238 (animal foods=156.1 kcal/day) and nearly three times the mean animal food intake of the highest  
239 NCD cohorts (animal foods=117.3 kcal/day). SFA+PUFA+TFA is 66% higher in the lowest  
240 NCD cohorts compared with the highest NCD cohorts (406.3 kcal/day versus 244.5 kcal/day:  
241  $406.3/244.5=1.662$ ). The rate of vitamin A deficiency in children is 75% higher in the highest

242 NCD cohorts than the lowest NCD cohorts (24678 / 14082=1.752). Vitamin A is a fat soluble  
243 vitamin coming largely from animal foods.

244  
245 Table 4 also reports the TMREL levels of the metabolic risk factors, 15 dietary risk factors,  
246 alcohol, and vitamin A deficiency. The 990 cohorts with the lowest mean NCD of male-female  
247 pairs of cohorts have mean BMI=23.77, but the range goes from below to above the TMREL  
248 range (BMI range: 19.61 to 28.57). The 1054 cohorts with the highest NCD (mean NCD=2064)  
249 also have wide ranging BMI levels (mean BMI=21.60, range: 17.95 to 27.73). The 576 cohorts  
250 within the FPG TMREL range (FPG: 4.8 to 5.4 mmol/L) average 1409 NCD with a very wide  
251 range (NCD range: 426 to 3349). The 7307 cohorts with mean FPG < 4.8 mmol/L have mean  
252 NCD=1428, again with a very wide range (NCD range: 424 to 4321). Not a single cohort has a  
253 mean LDLC or mean SBP within the TMREL.

254  
255 Table 5 shows the NCD trend (by least squared linear regression) from 1990 to 2017 correlated  
256 with the trends of metabolic and dietary risk factors. Notably, NCD trends downwards (- 2.11  
257 NCD) while all the metabolic risk factors and macronutrient risk factors trend up except for  
258 LDLC, corn availability, rice availability, sweet potato availability, and trans fatty acids. The  
259 NCD trend correlates negatively with BMI, FPG, SBP, and negatively with all macronutrient risk  
260 factors except for fish (p=0.86), sugary beverages, rice, sweet potatoes, and trans fatty acids.

261  
262 As a contrast to the worldwide GBD data analysis, Table 6a shows NCD correlated with risk  
263 factors from subnational data of the USA, UK, Mexico, and Japan (n combined=730 cohorts). In  
264 these mostly developed countries (Mexico is classified advanced developing<sup>12</sup>) with NCD much

265 lower than worldwide (NCD four countries=1071 versus worldwide=1426), mean BMI is  
266 strongly positively correlated with NCD ( $r=0.504$ , (95% CI 0.447 to 0.556,  $p<0.0001$ ). As  
267 opposed to the worldwide NCD analysis in Table 4, processed meat, red meat, milk, poultry,  
268 SFA, PUFA, and kcal available are all at least moderately strongly correlated with NCD. As  
269 opposed to the worldwide NCD trend's correlations in Table 5; the four country NCD trend is  
270 positively correlated with the trends of processed meat, red meat, fish, poultry, eggs, and SFA.  
271  
272

## 273 **Discussion**

274 Table 1 shows that systematic literature review derived dietary risks account for only 1.9%:  
275 (27.07 dietary risks related NCD / 1426 total NCD), bringing the dietary risks metric into  
276 question. Regarding the USA, Table 1 shows the relatively high percent of NCD deaths  
277 accounted for by dietary risks (% NCD due to dietary risks: 3.62%). Additionally, the USA has a  
278 relatively strong correlation of dietary risks correlated with NCD with total NCD ( $r=0.937$ , 95%  
279 CI: 0.924 to 0.948,  $p<0.0001$ ). This suggests that the dietary risks metric, based on systematic  
280 literature reviews, may be biased toward the NCD data from the USA and other developed  
281 countries over developing countries.

282

283 The Sahel region of Africa, which has the world's lowest shares of DALYs attributed to dietary  
284 risks of any region,<sup>1</sup> has higher than the worldwide average of NCD (Sahel region NCD: 1580  
285 versus worldwide NCD: 1426. This also implies that the dietary risks metric may be biased  
286 toward dietary risk factors as reported in medical literature from developed countries. In Central  
287 and Eastern Europe, which literature reviews show have among the world's highest shares of  
288 DALYs attributed to dietary risks of any region,<sup>1</sup> the much higher than average NCD has a range  
289 that greatly overlaps the range of the Sahel region of Africa (Central and Eastern Europe: mean  
290 NCD=2067, range: 875-3193 versus Sahel region: mean NCD=1580, range: 1115-3229). This  
291 comparison further calls into question the evidence basis of the composite dietary risks metric.

292

293 In Tables 2a and 2b, NCD negatively correlate with BMI, FPG, and LDLC. However, literature  
294 review derived dietary risks related to NCD positively correlate with BMI, FPG, and LDLC.

295 This also suggests that the dietary risks metric is biased toward the survey findings of the USA



296 and other developed countries in which high levels of BMI, FPG, and LDLC are more prevalent  
297 than in developing countries.

298  
299 Tables 3a and 3b detail how NCD in the cohorts lowest in BMI are much higher than in cohorts  
300 highest in BMI (BMI<19 kg/M<sup>2</sup>: mean NCD=1821 versus BMI >24.95 kg/M<sup>2</sup>: mean  
301 NCD=1207). This is further suggestive evidence that literature derived high BMI, high FPG, and  
302 high LDLC attributions of NCD and noncommunicable disease DALYs are biased toward  
303 developed countries over developing countries.

304  
305 Table 3 also shows that the high NCD of cohorts with large numbers of underweight cohorts  
306 (BMI< 18.5) are associated with very low mean animal food kcal/day intake that is about one-  
307 ninth the animal food kcal/day intake of the highest BMI cohorts (mean animal food intake  
308 lowest mean BMI cohorts=39.32 kcal/day versus mean animal food intake of the cohorts with  
309 the highest mean BMI=367.2 kcal/day: 367.2/39.32=9.33). These worldwide data are at variance  
310 with the lipid hypothesis (saying that dietary saturated fat and cholesterol, largely from animal  
311 foods, cause high LDLC and atherosclerosis) as the dominant dietary risk factor for  
312 cardiovascular disease (CVD). However, as is shown in Table 6, dietary SFA and cholesterol  
313 may still strongly contribute to CVD mostly in developed countries with high intakes of animal  
314 foods and the associated high rates of overweight and obesity.

315  
316 Compared with analysing these worldwide GBD data, systematic literature reviews with  
317 individual participant analysis would likely be much better than using GBD mean cohort values  
318 of with about 1 million people per cohort in documenting CVD and NCD associated with

319 obesity, overweight, normal weight and underweight. Flegal, et. al., with an individual  
320 participant level systematic review of BMI levels related to longevity, report that, compared to  
321 normal weight ( $18.5 \leq \text{BMI} < 25$ ), the summary HRs are the following: overweight ( $25 \leq \text{BMI} < 30$ ):  
322 (HR  $r=0.94$  (95% CI, 0.91-0.96), stage 1 obesity ( $30 \leq \text{BMI} < 35$ ): HR  $r=0.95$  (95% CI, 0.88-1.01),  
323 and above stage 1 obesity ( $\text{BMI} \geq 35$ ): HR  $r=1.29$  (95% CI, 1.18-1.41).<sup>13</sup> A systematic review by  
324 Aune, et. al. including underweight people finds BMI=20 gives a 15% increase in all cause  
325 mortality (HR  $r=1.15$  (95% CI, 1.13-1.17),  $p < 0.0001$ ) and BMI=17.5 gives a 47% increase in all  
326 cause mortality (HR  $r=1.47$  (95% CI, 1.43-1.51),  $p < 0.0001$ )<sup>14</sup> These are consistent with the  
327 Table 3 findings for low BMI.

328  
329 While GBD data on mean BMIs of cohorts cannot probe the impact of overweight and obesity on  
330 NCD as can literature reviews, GBD data should be very informative for estimating the NCD  
331 impact of cohorts with high BMI on average (i.e., mean BMI  $\geq 25$ ) in comparison with cohorts  
332 that are underweight and normal weight on average (i.e., mean BMI  $< 25$ ). The 973 cohorts with  
333 mean BMI  $\geq 25$  have mean NCD=1208, while the 6913 cohorts with mean BMI  $< 25$  have average  
334 NCD=1457. The BMI  $\geq 25$  cohorts account for 10.5% of the total NCD and the BMI  $< 25$  account  
335 for the remaining 89.5% of the NCD (BMI  $\geq 25$  cohorts: 973 cohorts \* 1208 (mean NCD) =  
336 1,175,384 total NCD versus BMI  $< 25$  cohorts: 6913 cohorts \* 1457 (mean NCD) = 10,072,241  
337 total NCD: 1,175,384 + 10,072,241 = 11,247,625 (total NCD), mean BMI  $\geq 25$ : 1,175,384 /  
338 11,247,625 = 0.1045 and mean BMI  $< 25$ : 10,072,241 / 11,247,625 = 0.8955).

339  
340 BMI  $\geq 25$  cohorts also have higher FPG and LDLC: FPG mean=4.71 and LDLC mean=2.79  
341 versus the BMI  $< 25$  cohorts with: FPG mean=4.25 and LDLC mean=2.30. The mean levels of

342 SBP of the BMI $\geq$ 25 cohorts and the BMI<25 cohorts differ by only 0.2 mm Hg (BMI $\geq$ 25  
343 cohorts SBP mean=133.71 versus BMI<25 cohorts SBP mean=133.91). These comparisons  
344 strongly suggest that high levels of dietary and metabolic risk factors should account for about  
345 10% of the worldwide NCD rather than about 62%, which can be derived from what is reported  
346 from the analyses based on systematic literature reviews ((35 million worldwide deaths/year  
347 attributable to dietary risks and metabolic risk factors / 56.5 million worldwide deaths/year<sup>1</sup>)  
348 =0.6195).

349  
350 These GBD data showing that low consumption of animal foods and fatty acids correlate  
351 strongly with low BMI and high NCD suggests that deficiencies of the fat soluble vitamins A, D,  
352 E, and K might contribute to CVD and thereby NCD. Animal foods are the primary sources of  
353 each of these vitamins and their absorption in the gut depends on adequate fatty acid intake that  
354 also comes largely from animals. By different mechanisms, deficiencies of each of these fat  
355 soluble vitamins raises the risk of CVD (vitamins A,<sup>15</sup> D,<sup>16</sup> E,<sup>15</sup> and K<sup>17</sup>).

356  
357 Our “fat soluble vitamin hypothesis” is that the high rates of CVD and, consequently, NCD in  
358 countries with low animal food and low fatty acid intake stem to a significant degree from  
359 deficiencies of fat soluble vitamins. For instance, over three times the vitamin A deficiency  
360 prevalence in children occurs in the low BMI cohorts compared to high BMI cohorts (32.2% of  
361 children < 5 years old of low BMI cohorts have vitamin A deficiency versus 10. 3% of children  
362 from the high BMI cohorts, see Table 3).

363

364 Table 4, which compares 990 cohorts with the lowest NCD with 1054 cohorts with the highest  
365 NCD, gives similar findings as Table 3 with low and high BMI levels. The metabolic and dietary  
366 risk factors for the mean NCD of the lowest 1054 cohorts does not perceptively correspond  
367 better with TMREL ranges than do the mean NCD of the highest 990 cohorts.

368  
369 Again the higher intake of animal foods is associated with lower levels of NCD in Table 4. This  
370 is all consistent with the hypothesis that fat soluble vitamin deficiencies significantly contribute  
371 to NCD. The 75% higher rate of vitamin A deficiencies of the highest cohorts in NCD (vitamin  
372 A deficiency rate =24,687/100k/year) versus the lowest NCD cohorts (14,082/100k/year) and is  
373 another example.

374  
375 Table 5 shows how the worldwide downward NCD trend from 1990 to 2017 relates to the trends  
376 of the metabolic and dietary risk factors. While NCD trends downwards by -2.11 /year on  
377 average, BMI, FPG, and SBP are trending upwards and LDLC is neutral. The NCD trend  
378 negatively correlating with the BMI and FPG trends reinforces Table 2a data showing negative  
379 correlations of NCD with BMI and FPG.

380  
381 These metabolic risk factor correlations with NCD and the metabolic risk factor trends with the  
382 NCD trend do not exclude that high levels of metabolic risk factors contribute significantly to  
383 NCD. We have a vast literature relating individuals with high metabolic risk factor levels with  
384 increased NCD. However, these GBD cohort data, now including the trend analysis, suggest that  
385 BMI, FPG and perhaps LDLC correlate negatively with NCD.

386

387 In Table 5, all of the 20 food commodities are trending upwards except for corn, trans fatty acids,  
388 rice and sweet potatoes. Kilocalories (kcal) /day available, a covariate, goes up by 12  
389 kcal/day/year. As might be expected, trends of sugary beverages and trans fatty acid (the only  
390 clearly always harmful food risk factors) positively correlate with the NCD trend. With  
391 worldwide development, vitamin A deficiency in children is on the decline (-269  
392 cases/100k/year from 1990-2017), most likely related to increased animal foods, which contain  
393 most of the dietary vitamin A and fatty acids, which are required for gut absorption of vitamin A.  
394  
395 Despite the major increase in percapita food intake worldwide from 1990 to 2017, the NCD trend  
396 and the trends of most macronutrients are still negatively correlated, indicating that more food  
397 percapita is needed to drive down NCD, especially in developing countries. Dietary choices need  
398 to be improved in places, especially developed countries, where abundant food availability  
399 allows for and often promotes high levels of metabolic risk factors.

400  
401 Table 4 shows that the cohorts with minimal NCD had higher mean sodium intake (3.67 g/day)  
402 than the cohorts with maximum NCD (3.27 g/day). Accordingly, sodium g/day trend correlates  
403 negatively with the NCD trend. This suggests that sodium lowering public health campaigns may  
404 not be effective to benefit population health. However, individuals with CVD, hypertension, or  
405 chronic diseases causing fluid overload still should reduce dietary sodium.

406  
407 Table 6 shows how using data primarily from developed countries can easily support the lipid  
408 hypothesis that defines saturated fat and cholesterol as the major dietary drivers of CVD and  
409 NCD. However Table 6 findings are not generalisable to the world. In the four countries with

410 subnational GBD data in Table 6, the high level animal food consumption (animal foods=445  
411 kcal/day) reverses the worldwide negative correlation of animal food with NCD (Four countries  
412 cohorts: NCD versus animal foods,  $r=0.214$ , 95% CI (0.144 to 0.282),  $p<0.0001$ ). Meat is  
413 especially strongly positively correlated with NCD (NCD versus processed meats  $r=0.576$ , 95%  
414 CI (0.525 to 0.622),  $p<0001$  and NCD versus red meat  $r=0.715$ , 95% CI (0.677 to 0.748),  
415  $p<0001$ ).

416  
417 The unexpected positive correlations of NCD with corn availability (covariate), potato  
418 availability (covariate) and fruit in Table 6 may be explained. Corn availability includes high  
419 fructose corn syrup used widely in developed countries. Corn availability and sugary beverages  
420 are highly positively correlated in these cohorts (corn availability versus sugary beverages,  
421  $r=0.944$ , 95% CI 0.935 to 0.951,  $p<0.0001$ ). Fruits include 100% fruit juice in the GBD database  
422 (see Supplementary Table 1). In the USA, about one-third of fruits consumed are in the form of  
423 100% fruit juices.<sup>18</sup> In these four countries combined, fruits are positively correlated with sugary  
424 beverages (fruits versus sugary beverages,  $r=0.186$ , 95% CI 0.115 to 0.255,  $p<0.0001$ ). Potato  
425 availability includes highly processed potatoes like potato chips and French fries. According to  
426 the International Potato Center, at least 50% of potatoes consumed worldwide are highly  
427 processed.<sup>19</sup> Processed potatoes may contain up to 6 g (or 54 kcal) per 100 kcal serving.<sup>20</sup> While  
428 SFA worldwide averages only 191.3 kcal/day and is negatively correlated with NCD (SFA  
429 versus NCD worldwide ( $n=7886$  cohorts),  $r=-0.253$ , 95% CI -0.274 to -0.232,  $p<0.0001$ ), SFA  
430 averages 269.4 kcal/day and is positively correlated with NCD in these four mostly developed  
431 countries combined (SFA versus NCD four countries with subnational data ( $n=730$  cohorts),

432  $r=0.642$ , 95% CI 0.597 to 0.682,  $p<0.0001$ ). The lipid hypothesis is strongly supported by data  
433 on people from these four countries and other developed countries.

434  
435 As mentioned in the IHME GBD 2019 risk factor paper, the assessment of the joint effects of  
436 dietary and other risk factors depends on two critical factors: the correlation of risk exposure and  
437 the estimation of the joint effects of groups of risks together.<sup>1</sup> While the estimates of exposure to  
438 the individual dietary risk factors appears excellent and improving with each iteration of the  
439 GBD project, the estimation of the joint effects of the 15 food variables composite dietary risks  
440 and the metabolic risk factors are problematic, as discussed regarding Tables 1 and 2 above.

441  
442 The IHME GBD methodology assumption that, for each age-sex-location-year, the estimates of  
443 the prevalence of exposure of each of the dietary variables are independent from each other is  
444 said to be supported by findings from USA data from the National Health and Nutrition  
445 Examination Survey. While this may have been the case for the USA where intakes of dietary  
446 commodities vary much less than they do worldwide, the assumption of independence of  
447 exposures of different dietary variables worldwide is highly dubious. As shown in Tables 3 and  
448 4, there are marked differences between animal foods intake (four dietary risk factors and two  
449 dietary covariates) between cohorts with the lowest and highest mean BMI and the lowest and  
450 highest mean NCD. The GBD 2019 risk factor paper states in the limitations,

451  
452 “To avoid over-estimation of the joint effects, we computed the non-mediated  
453 relative risks and then assumed that non-mediated relative risks are multiplicative.  
454 This approach does not capture potential synergy between relative risks in which

455 some combinations might be super-multiplicative. For some areas such as diet,  
456 the joint estimation is very important for public policy. Further, more detailed  
457 work is needed to strengthen the evidence base for understanding mediation.”<sup>1</sup>

458  
459 This GBD formatted data analysis is perhaps the detailed work that is needed to strengthen the  
460 evidence base for understanding mediation and for more accurately determining the deaths and  
461 DALYs attributable to dietary and other risk factors.

462  
463 Also mentioned under limitations in the GBD risk factor paper, “...we assume that relative risks  
464 as a function of exposure are universal and apply in all locations and time periods.”<sup>1</sup> Tables 4-6  
465 of this GBD data analysis gives a clear example of how the level of exposure of animal foods in  
466 cohorts worldwide versus in the four countries with subnational data lead to diametrically  
467 opposing correlations between NCD and the six animal foods kcal/day. Likewise, Table 6 shows  
468 the worldwide NCD trend negative correlations with trends of animal foods and SFA are  
469 reversed in the subnational data analysis (n=730 cohorts) for processed meat, red meat, milk,  
470 poultry and SFA.

471  
472 **Limitations**

473 The GBD data on animal foods, plant foods, alcohol, sugary beverages, and fatty acids are not  
474 comprehensive and comprised only 1191.4 kcal/day on average worldwide. Subnational data are  
475 available on only four countries. Because the data formatting and statistical methodology are  
476 new, this is necessarily a post hoc analysis and no pre-analysis protocol is possible. This GBD  
477 data analysis should be repeated with the most recently released GBD 2019 data when it  
478 becomes available to volunteer collaborators.



## 479 **Generalisability**

480 The new methodology presented for probing the GBD raw data to find correlations between risk  
481 factors (e.g., dietary and metabolic risk factors) and health outcomes (e.g., NCD) can be applied  
482 to any of the risk factors and health outcomes available with the new GBD 2019. The intake of  
483 each of the 20 dietary variables in this analysis that corresponds with the 990 cohorts with the  
484 lowest NCD worldwide will not be the optimal healthy diet for everyone. The total kcal/day of  
485 animal foods, plant foods and fatty acids are all important. Having comprehensive data on  
486 dietary inputs is key to more accurate and reliable analyses. Baseline metabolic risk factor levels  
487 are important. The optimal diet to lower NCD risk for someone with BMI=35 will be different  
488 than in someone with BMI=20. This analysis is merely a proof of concept the the GBD data  
489 analysis methodology can derive plausible results and that the GBD data analysis methodology  
490 can be complimentary to the systematic literature review methodology.

491

## 492 **Conclusion**

493 Statistically analysing GBD data provides a tool to compliment the systematic literature review  
494 methodology in forming policy recommendations, clinical practice guidelines, and public health  
495 recommendations. Eventually, GBD data analysis can bring more rigor, precision, and consensus  
496 to the field of population health, especially in the areas of dietary and metabolic risk factors.

497

498

499 **Table 1 Dietary risks related NCD compared with total NCD worldwide (n=7886 cohorts,**  
 500 **representing about 7.5 billion people in 2020)**

| Regions or countries              | NCD in region or country  | NCD r | SD    | Min   | Max  | Dietary risks versus total NCD r | 95% CI         | p      | (Dietary risks related NCD / Total NCD) * 100 = % |
|-----------------------------------|---------------------------|-------|-------|-------|------|----------------------------------|----------------|--------|---------------------------------------------------|
| <b>World</b>                      | Dietary risks related NCD | 27.07 | 22.92 | 2.6   | 220  |                                  |                |        |                                                   |
| <b>World</b>                      | Total NCD                 | 1426  | 463   | 424   | 4321 | 0.390                            | 0.371 to 0.408 | <.0001 | 1.9                                               |
| <b>USA</b>                        | Dietary risks related NCD | 42.90 | 19.46 | 14.17 | 98.5 |                                  |                |        |                                                   |
| <b>USA</b>                        | Total NCD                 | 1184  | 316   | 697   | 2312 | 0.937                            | 0.924 to 0.948 | <.0001 | 3.62                                              |
| <b>UK</b>                         | Dietary risks related NCD | 13.06 | 14.67 | 2.71  | 61.1 |                                  |                |        |                                                   |
| <b>UK</b>                         | Total NCD                 | 1195  | 330   | 777   | 1823 | 0.610                            | 0.428 to 0.740 | <.0001 | 1.09                                              |
| <b>African Sahel</b>              | Dietary risks related NCD | 25.03 | 11.28 | 11.7  | 47.1 |                                  |                |        |                                                   |
| <b>African Sahel</b>              | Total NCD                 | 1580  | 340   | 1115  | 3229 | 0.565                            | 0.441 to 0.666 | <.0001 | 1.58                                              |
| <b>Central and Eastern Europe</b> | Dietary risks related NCD | 50.24 | 42.14 | 8.79  | 220  |                                  |                |        |                                                   |
| <b>Central and Eastern Europe</b> | Total NCD                 | 2067  | 827   | 875   | 3193 | 0.355                            | 0.253 to 0.447 | <.0001 | 2.43                                              |

501  
 502  
 503

504 **Table 2. Worldwide NCD correlated with metabolic risk factors and dietary risks related**  
 505 **NCD also correlated with metabolic risk factors**

506 **Table 2a. Worldwide NCD correlated with metabolic risk factors**

| <b>NCD versus metabolic risk factors (n=7886 cohorts)</b> | <b>Mean</b> | <b>SD</b> | <b>Max</b> | <b>Min</b> | <b>NCD r</b> | <b>95% CI</b>    | <b>p</b> |
|-----------------------------------------------------------|-------------|-----------|------------|------------|--------------|------------------|----------|
| NCD                                                       | 1426        | 462.8     | 423.8      | 4321       |              |                  |          |
| BMI kg/M <sup>2</sup>                                     | 21.79       | 2.31      | 17.95      | 29.39      | -0.308       | -0.328 to -0.288 | <.0001   |
| Fasting plasma glucose mmol/L                             | 4.31        | 0.35      | 3.32       | 5.58       | -0.141       | -0.163 to -0.119 | <.0001   |
| LDL cholesterol mmol/L                                    | 2.36        | 0.40      | 1.27       | 3.25       | -0.341       | -0.360 to -0.321 | <.0001   |
| Systolic BP mm Hg                                         | 133.9       | 4.33      | 123.4      | 147.9      | 0.068        | 0.046 to 0.090   | <.0001   |

507

508 **Table 2b. Dietary risks related NCD correlated with metabolic risk factors**

| <b>Dietary risks related NCD versus metabolic risk factors (n=7886 cohorts)</b> | <b>Mean</b> | <b>SD</b> | <b>Min</b> | <b>Max</b> | <b>Diet related NCD r</b> | <b>95% CI</b>  | <b>p</b> |
|---------------------------------------------------------------------------------|-------------|-----------|------------|------------|---------------------------|----------------|----------|
| <b>Dietary risks related NCD</b>                                                | 22.60       | 20.31     | 1.7        | 196.8      |                           |                |          |
| BMI kg/M <sup>2</sup>                                                           | 21.79       | 2.31      | 17.95      | 29.39      | 0.207                     | 0.186 to 0.228 | <.0001   |
| Fasting plasma glucose mmol/L                                                   | 4.31        | 0.35      | 3.32       | 5.58       | 0.113                     | 0.091 to 0.134 | <.0001   |
| LDL cholesterol mmol/L                                                          | 2.36        | 0.40      | 1.27       | 3.25       | 0.147                     | 0.125 to 0.169 | <.0001   |
| Systolic BP mm Hg                                                               | 133.9       | 4.33      | 123.4      | 147.9      | 0.228                     | 0.207 to 0.249 | <.0001   |

509

510

511 **Table 3. BMI<19.00 versus BMI >24.95 associated with NCD and NCD risk factors**

512 **Table 3a. BMI<19 associated with NCD and NCD risk factors**

| <b>NCD with mean BMI&lt;19 kg/M<sup>2</sup> (n=952 cohorts)</b> | <b>Mean</b> | <b>SD</b> | <b>Min</b> | <b>Max</b> |
|-----------------------------------------------------------------|-------------|-----------|------------|------------|
| <b>NCD</b>                                                      | 1821        | 215       | 1242       | 3229       |
| <b>BMI kg/M<sup>2</sup></b>                                     | 18.86       | 0.10      | 17.95      | 19.00      |
| <b>FPG mmol/L</b>                                               | 4.21        | 0.21      | 3.48       | 4.32       |
| <b>LDLC mmol/L</b>                                              | 1.89        | 0.16      | 1.41       | 2.22       |
| <b>SBP mm Hg</b>                                                | 130.9       | 2.39      | 125.7      | 139.9      |
| <b>Processed meat kcal/day</b>                                  | 1.33        | 0.32      | 0.31       | 1.62       |
| <b>Red meat kcal/day</b>                                        | 11.29       | 13.09     | 3.84       | 61.38      |
| <b>Fish kcal/day</b>                                            | 1.57        | 0.77      | 0.47       | 7.53       |
| <b>Milk kcal/day</b>                                            | 14.99       | 6.91      | 1.35       | 19.94      |
| <b>Poultry kcal/day</b>                                         | 5.85        | 4.53      | 2.72       | 24.99      |
| <b>Eggs kcal/day</b>                                            | 4.29        | 1.06      | 1.23       | 5.81       |
| <b>Alcohol kcal/day</b>                                         | 110.3       | 40.89     | 33.37      | 316.4      |
| <b>Sugary beverages kcal/day</b>                                | 316.2       | 51.57     | 199.4      | 350.0      |
| <b>Corn kcal/day</b>                                            | 15.27       | 14.10     | 0.47       | 148.4      |
| <b>potatoes kcal/day</b>                                        | 47.21       | 41.85     | 10.27      | 289.1      |
| <b>SFA kcal/day</b>                                             | 126.5       | 24.41     | 71.02      | 155.0      |
| <b>PUFA kcal/day</b>                                            | 30.46       | 8.77      | 2.99       | 47.74      |
| <b>TFA kcal/day</b>                                             | 12.32       | 4.13      | 2.64       | 15.32      |
| <b>Fruits kcal/day</b>                                          | 20.89       | 7.53      | 3.58       | 33.95      |
| <b>Vegetables kcal/day</b>                                      | 58.24       | 26.10     | 11.60      | 99.86      |
| <b>Nuts and seeds kcal/day</b>                                  | 5.40        | 2.25      | 1.09       | 12.55      |
| <b>Whole grains kcal/day</b>                                    | 66.99       | 28.77     | 4.03       | 124.3      |
| <b>Legumes kcal/day</b>                                         | 82.31       | 32.00     | 26.42      | 180.8      |
| <b>Rice kcal/day</b>                                            | 238.4       | 120.1     | 1.42       | 443.6      |
| <b>Sweet potatoes kcal/day</b>                                  | 6.03        | 8.12      | 2.04       | 53.93      |
| <b>Kcal /day</b>                                                | 2246        | 189       | 1579       | 2347       |
| <b>Vitamin A deficient children/100k/yr</b>                     | 32157       | 6122      | 21075      | 43336      |
| <b>Sodium g/day</b>                                             | 3.24        | 0.50      | 2.02       | 4.69       |
| <b>Calcium g/day</b>                                            | 0.20        | 0.05      | 0.11       | 0.28       |
| <b>Dietary fiber g/day</b>                                      | 8.23        | 2.94      | 2.78       | 16.25      |
| <b>Animal foods kcal/day</b>                                    | 39.32       | 16.23     | 18.58      | 97.38      |
| <b>Plant foods kcal/day</b>                                     | 540.7       | 120.6     | 229.8      | 809.6      |
| <b>SFA+PUFA+TFA kcal/day</b>                                    | 169.3       | 22.94     | 79.92      | 185.0      |

513

514

515 **Table 3b. BMI>24.95 associated with NCD and NCD risk factors**

| <b>NCD with mean BMI &gt;24.95 (n=987 cohorts)</b> | <b>Mean</b> | <b>SD</b> | <b>Min</b> | <b>Max</b> |
|----------------------------------------------------|-------------|-----------|------------|------------|
| <b>NCD</b>                                         | 1207        | 326.9     | 660.9      | 3021       |
| <b>BMI kg/M<sup>2</sup></b>                        | 26.06       | 0.69      | 24.97      | 29.39      |
| <b>Fasting plasma glucose mmol/L</b>               | 4.71        | 0.32      | 3.69       | 5.58       |
| <b>LDL cholesterol mmol/L</b>                      | 2.79        | 0.22      | 1.83       | 3.20       |
| <b>Systolic BP mm Hg</b>                           | 133.8       | 5.29      | 125.9      | 146.0      |
| <b>Processed meat kcal/day</b>                     | 20.90       | 17.46     | 0.60       | 68.77      |
| <b>Red meat kcal/day</b>                           | 100.7       | 53.73     | 18.65      | 207.8      |
| <b>Fish kcal/day</b>                               | 11.69       | 4.36      | 3.07       | 27.73      |
| <b>Milk kcal/day</b>                               | 65.95       | 28.52     | 5.81       | 146.8      |
| <b>Poultry kcal/day</b>                            | 133.4       | 62.63     | 18.53      | 411.9      |
| <b>Eggs kcal/day</b>                               | 34.56       | 10.69     | 7.41       | 51.53      |
| <b>Alcohol kcal/day</b>                            | 127.3       | 88.00     | 6.07       | 429.8      |
| <b>Sugary beverages kcal/day</b>                   | 285.4       | 206.5     | 131.0      | 1472       |
| <b>Corn kcal/day</b>                               | 40.57       | 63.45     | 0.32       | 300.7      |
| <b>potatoes kcal/day</b>                           | 111.6       | 57.67     | 12.36      | 338.1      |
| <b>SFA kcal/day</b>                                | 275.9       | 74.39     | 109.5      | 479.4      |
| <b>PUFA kcal/day</b>                               | 183.8       | 97.77     | 36.04      | 346.9      |
| <b>TFA kcal/day</b>                                | 33.28       | 22.40     | 2.25       | 77.76      |
| <b>Fruits kcal/day</b>                             | 63.45       | 19.82     | 16.23      | 161.4      |
| <b>Vegetables kcal/day</b>                         | 115.7       | 44.94     | 22.06      | 304.2      |
| <b>Nuts and seeds kcal/day</b>                     | 18.24       | 11.47     | 0.07       | 103.0      |
| <b>Whole grains kcal/day</b>                       | 52.49       | 31.10     | 1.60       | 173.5      |
| <b>Legumes kcal/day</b>                            | 37.70       | 20.82     | 2.80       | 120.3      |
| <b>Rice kcal/day</b>                               | 30.25       | 33.13     | 3.59       | 179.6      |
| <b>Sweet potatoes kcal/day</b>                     | 2.35        | 3.77      | 0.02       | 37.83      |
| <b>Kcal /day</b>                                   | 3227        | 221       | 2246       | 3898       |
| <b>Vitamin A deficient children/100k/yr</b>        | 10320       | 7607      | 1400       | 39657      |
| <b>Sodium g/day</b>                                | 3.52        | 0.67      | 1.53       | 6.47       |
| <b>Calcium g/day</b>                               | 0.58        | 0.17      | 0.17       | 1.04       |
| <b>Dietary fiber g/day</b>                         | 11.01       | 2.10      | 5.74       | 18.15      |
| <b>Animal foods kcal/day</b>                       | 367.2       | 148.8     | 73.58      | 618.3      |
| <b>Plant foods kcal/day</b>                        | 472.3       | 91.79     | 227.0      | 817.9      |
| <b>SFA+PUFA+TFA kcal/day</b>                       | 492.9       | 163.4     | 194.6      | 828.0      |

516

517 **Table 4. Comparing metabolic and dietary risk factor values in cohorts with the lowest and**  
 518 **highest NCD**

519 **Table 4a. Lowest NCD cohorts↓**

| <b>NCD and risk factors (n=990 cohorts with minimal NCD)</b> | <b>Mean</b> | <b>SD</b> | <b>Min</b> | <b>Max</b> | <b>TMREL low kcal/day</b> | <b>TMREL high kcal/day</b> |
|--------------------------------------------------------------|-------------|-----------|------------|------------|---------------------------|----------------------------|
| <b>NCD</b>                                                   | 923.8       | 267.0     | 423.8      | 1403       |                           |                            |
| <b>BMI kg/M<sup>2</sup></b>                                  | 23.77       | 1.49      | 19.61      | 28.57      | 20                        | 25                         |
| <b>FPG mmol/L</b>                                            | 4.49        | 0.30      | 3.54       | 5.58       | 4.8                       | 5.4                        |
| <b>LDLC mmol/L</b>                                           | 2.73        | 0.30      | 1.60       | 3.25       | 0.7                       | 1.3                        |
| <b>SBP mm Hg</b>                                             | 134.1       | 4.05      | 123.4      | 144.4      | 110                       | 115                        |
| <b>Processed meat kcal/day</b>                               | 12.46       | 11.75     | 0.87       | 66.78      | 0                         | 0                          |
| <b>Red meat kcal/day</b>                                     | 81.85       | 48.92     | 12.03      | 205.4      | 0                         | 0                          |
| <b>Fish kcal/day</b>                                         | 49.34       | 93.27     | 2.66       | 370.4      | 64                        | 70                         |
| <b>Milk kcal/day</b>                                         | 54.38       | 32.16     | 14.60      | 146.8      | 180                       | 250                        |
| <b>Poultry kcal/day available</b>                            | 89.81       | 47.20     | 4.74       | 240.6      |                           |                            |
| <b>Eggs kcal/day available</b>                               | 32.61       | 13.59     | 4.77       | 69.64      |                           |                            |
| <b>Alcohol kcal/day</b>                                      | 103.6       | 65.99     | 4.25       | 296.7      | 0                         | 0                          |
| <b>Sugary beverages kcal/day</b>                             | 350.8       | 257.2     | 72.91      | 1472       | 200                       | 200                        |
| <b>Corn kcal/day available</b>                               | 37.20       | 52.04     | 1.79       | 281.5      |                           |                            |
| <b>potatoes kcal/day available</b>                           | 95.68       | 48.95     | 18.09      | 307.8      |                           |                            |
| <b>SFA kcal/day</b>                                          | 245.0       | 77.92     | 129.3      | 481.1      |                           |                            |
| <b>PUFA kcal/day</b>                                         | 143.3       | 60.62     | 34.28      | 334.7      | 207                       | 266                        |
| <b>TFA kcal/day</b>                                          | 17.97       | 16.28     | 3.59       | 73.64      | 0                         | 0                          |
| <b>Fruits kcal/day</b>                                       | 63.66       | 18.63     | 21.61      | 113.7      | 112                       | 122                        |
| <b>Vegetables kcal/day</b>                                   | 105.8       | 48.24     | 9.48       | 228.7      | 182                       | 208                        |
| <b>Nuts and seeds kcal/day</b>                               | 14.42       | 11.49     | 0.26       | 45.28      | 58                        | 110                        |
| <b>Whole grains kcal/day</b>                                 | 50.07       | 32.34     | 1.61       | 165.1      | 323                       | 370                        |
| <b>Legumes kcal/day</b>                                      | 49.40       | 26.95     | 3.01       | 134.7      | 125                       | 139                        |
| <b>Rice kcal/day available</b>                               | 58.10       | 49.08     | 3.59       | 171.6      |                           |                            |
| <b>Sweet potatoes kcal/day available</b>                     | 4.65        | 6.90      | 0.04       | 37.83      |                           |                            |
| <b>Kcal available/day</b>                                    | 2959        | 403       | 1948       | 3572       |                           |                            |
| <b>Vitamin A deficiency in children</b>                      | 14082       | 8954      | 1368       | 44100      | 0                         | 0                          |
| <b>Sodium g/day</b>                                          | 3.67        | 1.15      | 1.33       | 6.70       | 1                         | 5                          |
| <b>Calcium g/day</b>                                         | 0.49        | 0.17      | 0.19       | 1.04       | 1.06                      | 1.1                        |
| <b>Dietary fiber g/day</b>                                   | 10.84       | 2.32      | 5.41       | 18.15      | 21                        | 22                         |
| <b>Animal foods kcal/day</b>                                 | 320.4       | 141.7     | 52.52      | 701.4      |                           |                            |
| <b>Plant foods kcal/day</b>                                  | 479.0       | 91.16     | 293.6      | 730.8      |                           |                            |
| <b>SFA+PUFA+TFA kcal/day</b>                                 | 406.3       | 117.6     | 198.2      | 732.4      |                           |                            |

520  
 521 ↓ Because NCD levels of males are much higher than for females, for each location the NCD of males  
 522 and females are averaged and the average number of NCD for each male-female cohort pair<1070  
 523

524 **Table 4b. Highest NCD cohorts**↓

| <b>NCD and risk factors (n=1054 cohorts with maximal NCD)</b> | <b>Mean</b> | <b>SD</b> | <b>Min</b> | <b>Max</b> | <b>TMREL low kcal/day</b> | <b>TMREL high kcal/day</b> |
|---------------------------------------------------------------|-------------|-----------|------------|------------|---------------------------|----------------------------|
| <b>NCD</b>                                                    | 2064        | 572       | 1080       | 4321       |                           |                            |
| <b>BMI kg/M<sup>2</sup></b>                                   | 21.60       | 2.31      | 17.95      | 27.73      | 20                        | 25                         |
| <b>FPG mmol/L</b>                                             | 4.25        | 0.45      | 3.38       | 5.18       | 4.8                       | 5.4                        |
| <b>LDLC mmol/L</b>                                            | 2.27        | 0.48      | 1.34       | 3.20       | 0.7                       | 1.3                        |
| <b>SBP mm Hg</b>                                              | 135.6       | 5.27      | 123.7      | 147.9      | 110                       | 115                        |
| <b>Processed meat kcal/day</b>                                | 3.82        | 5.52      | 0.22       | 65.14      | 0                         | 0                          |
| <b>Red meat kcal/day</b>                                      | 39.04       | 35.31     | 6.56       | 194.8      | 0                         | 0                          |
| <b>Fish kcal/day</b>                                          | 4.37        | 3.28      | 0.40       | 20.32      | 64                        | 70                         |
| <b>Milk kcal/day</b>                                          | 25.26       | 19.90     | 1.06       | 100.9      | 180                       | 250                        |
| <b>Poultry kcal/day</b>                                       | 30.39       | 28.21     | 1.06       | 207.7      |                           |                            |
| <b>Eggs kcal/day</b>                                          | 14.39       | 14.69     | 0.79       | 49.16      |                           |                            |
| <b>Alcohol kcal/day</b>                                       | 58.14       | 45.65     | 5.77       | 340.4      | 0                         | 0                          |
| <b>Sugary beverages kcal/day</b>                              | 294.7       | 75.44     | 131.2      | 768.5      | 200                       | 200                        |
| <b>Corn kcal/day</b>                                          | 31.11       | 42.66     | 0.20       | 268.8      |                           |                            |
| <b>potatoes kcal/day</b>                                      | 112.2       | 110.8     | 3.94       | 533.9      |                           |                            |
| <b>SFA kcal/day</b>                                           | 186.3       | 60.78     | 71.02      | 447.5      |                           |                            |
| <b>PUFA kcal/day</b>                                          | 49.43       | 40.69     | 5.93       | 333.8      | 207                       | 266                        |
| <b>TFA kcal/day</b>                                           | 8.72        | 5.62      | 2.64       | 50.09      | 0                         | 0                          |
| <b>Fruits kcal/day</b>                                        | 25.70       | 14.17     | 3.58       | 107.5      | 112                       | 122                        |
| <b>Vegetables kcal/day</b>                                    | 59.86       | 41.70     | 14.43      | 152.6      | 182                       | 208                        |
| <b>Nuts and seeds kcal/day</b>                                | 4.76        | 3.88      | 0.05       | 49.94      | 58                        | 110                        |
| <b>Whole grains kcal/day</b>                                  | 34.76       | 33.77     | 1.34       | 146.9      | 323                       | 370                        |
| <b>Legumes kcal/day</b>                                       | 39.53       | 29.20     | 0.64       | 194.7      | 125                       | 139                        |
| <b>Rice kcal/day</b>                                          | 79.65       | 121.8     | 1.42       | 461.8      |                           |                            |
| <b>Sweet potatoes kcal/day</b>                                | 9.94        | 26.90     | 0.02       | 364.7      |                           |                            |
| <b>Kcal /day available</b>                                    | 2392        | 478       | 1579       | 3481       |                           |                            |
| <b>Vitamin A deficiency in children</b>                       | 24678       | 13103     | 1718       | 50969      | 0                         | 0                          |
| <b>Sodium g/day</b>                                           | 3.27        | 0.88      | 1.33       | 6.47       | 1                         | 5                          |
| <b>Calcium g/day</b>                                          | 0.30        | 0.17      | 0.08       | 0.86       | 1.06                      | 1.1                        |
| <b>Dietary fiber g/day</b>                                    | 9.06        | 2.94      | 2.72       | 20.67      | 21                        | 22                         |
| <b>Animal foods kcal/day</b>                                  | 117.3       | 97.21     | 14.53      | 612.9      |                           |                            |
| <b>Plant foods kcal/day</b>                                   | 397.5       | 199.7     | 145.0      | 847.1      |                           |                            |
| <b>SFA+PUFA+TFA kcal/day</b>                                  | 244.5       | 89.76     | 79.92      | 694.5      |                           |                            |

525  
 526 ↓ Because NCD levels of males are much higher than for females, for each location, the NCD of males  
 527 and females are averaged and the average number of NCD for each male-female cohort pair>1763  
 528

529 **Table 5. NCD trend versus risk factor trends**

| <b>NCD trend and risk factor trends worldwide (n=7886 cohorts)</b> | <b>Mean</b> | <b>SD</b> | <b>Min</b> | <b>Max</b> | <b>NCD trend v risk factor trend r</b> | <b>95% CI</b>    | <b>p</b> |
|--------------------------------------------------------------------|-------------|-----------|------------|------------|----------------------------------------|------------------|----------|
| <b>NCD trend</b>                                                   | -2.11       | 46.54     | -119       | 355        |                                        |                  |          |
| <b>BMI trend</b>                                                   | 0.08        | 0.03      | -0.02      | 0.22       | -0.055                                 | -0.077 to -0.033 | <.0001   |
| <b>FPG trend</b>                                                   | 0.02        | 0.01      | -0.01      | 0.04       | -0.158                                 | -0.179 to -0.136 | <.0001   |
| <b>LDLC trend</b>                                                  | 0.00        | 0.01      | -0.02      | 0.02       | 0.043                                  | 0.021 to 0.065   | 0.0001   |
| <b>SBP trend</b>                                                   | 0.02        | 0.11      | -0.48      | 0.31       | -0.055                                 | -0.077 to -0.033 | <.0001   |
| <b>Processed meat kcal/day trend</b>                               | 0.05        | 0.16      | -0.81      | 1.68       | -0.143                                 | -0.165 to -0.121 | <.0001   |
| <b>Red meat kcal/day trend</b>                                     | 0.55        | 1.09      | -3.29      | 4.73       | -0.114                                 | -0.136 to -0.092 | <.0001   |
| <b>Fish kcal/day trend</b>                                         | 0.22        | 0.95      | -0.13      | 9.79       | 0.002                                  | 0.020 to 0.024   | 0.8647   |
| <b>Milk kcal/day trend</b>                                         | 0.19        | 0.30      | -2.02      | 2.50       | -0.072                                 | -0.094 to -0.050 | <.0001   |
| <b>Poultry kcal/day trend</b>                                      | 1.15        | 1.04      | -0.87      | 7.66       | -0.020                                 | -0.042 to -0.002 | 0.0701   |
| <b>Eggs kcal/day trend</b>                                         | 0.30        | 0.49      | -0.88      | 1.27       | -0.147                                 | -0.169 to -0.126 | <.0001   |
| <b>Alcohol kcal/day trend</b>                                      | 0.03        | 0.16      | -0.91      | 1.99       | -0.270                                 | -0.290 to -0.249 | <.0001   |
| <b>Sugary beverages kcal/day trend</b>                             | 0.29        | 1.14      | -5.40      | 14.00      | 0.081                                  | 0.059 to 0.103   | <.0001   |
| <b>Corn kcal/day trend</b>                                         | -0.03       | 0.60      | -4.36      | 2.81       | -0.056                                 | -0.078 to -0.034 | <.0001   |
| <b>Potatoes kcal/day trend</b>                                     | 0.24        | 1.83      | -12.5      | 11.03      | -0.110                                 | -0.131 to -0.088 | <.0001   |
| <b>SFA trend</b>                                                   | 0.21        | 0.92      | -3.66      | 2.09       | -0.253                                 | -0.274 to -0.232 | <.0001   |
| <b>PUFA trend</b>                                                  | 1.00        | 0.96      | -3.03      | 5.47       | -0.026                                 | -0.048 to -0.004 | 0.0195   |
| <b>TFA trend</b>                                                   | -0.21       | 0.45      | -2.68      | 0.01       | 0.123                                  | 0.102 to 0.145   | <.0001   |
| <b>Fruits kcal/day trend</b>                                       | 0.62        | 0.60      | -2.08      | 4.10       | -0.095                                 | -0.117 to -0.073 | <.0001   |
| <b>Vegetables kcal/day trend</b>                                   | 1.39        | 1.61      | -7.96      | 8.47       | -0.027                                 | -0.049 to -0.005 | 0.0151   |
| <b>Nuts and seeds kcal/day trend</b>                               | 0.28        | 0.27      | -0.34      | 3.12       | -0.136                                 | -0.158 to -0.115 | <.0001   |
| <b>Whole grains kcal/day trend</b>                                 | 0.17        | 0.58      | -2.60      | 8.46       | 0.162                                  | 0.141 to 0.183   | <.0001   |
| <b>Legumes kcal/day trend</b>                                      | 0.37        | 0.98      | -3.24      | 5.40       | -0.087                                 | -0.109 to -0.065 | <.0001   |
| <b>Rice kcal/day trend</b>                                         | -0.78       | 1.29      | -5.05      | 3.50       | 0.191                                  | 0.170 to 0.212   | <.0001   |
| <b>Sweet potatoes kcal/day trend</b>                               | -0.46       | 1.34      | -4.82      | 3.91       | 0.124                                  | 0.102 to 0.146   | <.0001   |
| <b>Kcal/day available trend</b>                                    | 12.12       | 10.10     | -28.1      | 47.89      | -0.180                                 | -0.201 to -0.158 | <.0001   |
| <b>Vitamin A deficient children/100k/yr trend</b>                  | -269        | 253       | -1425      | 169.4      | -0.057                                 | -0.078 to -0.034 | <.0001   |
| <b>Sodium g/day trend</b>                                          | -0.001      | 0.044     | -0.219     | 0.085      | -0.107                                 | -0.128 to -0.085 | <.0001   |
| <b>Calcium g/day trend</b>                                         | 0.003       | 0.003     | -0.007     | 0.018      | 0.155                                  | 0.133 to 0.176   | <.0001   |
| <b>Dietary fiber g/day trend</b>                                   | 0.06        | 0.07      | -0.23      | 0.54       | -0.073                                 | -0.095 to -0.051 | <.0001   |

530  
531  
532  
533



534 **Table 6. NCD and the NCD trend versus risk factors and risk factor trends in USA, UK,**  
 535 **Mexico, and Japan combined**

536 **Table 6a NCD correlated with risk factors in USA, UK, Mexico, and Japan combined**

| NCD versus risk factors USA, UK, Mexico, and Japan (combined n=730 cohorts) | Mean  | SD    | Min   | Max   | r      | 95% CI           | p      |
|-----------------------------------------------------------------------------|-------|-------|-------|-------|--------|------------------|--------|
| <b>NCD</b>                                                                  | 1071  | 343   | 424   | 2312  |        |                  |        |
| <b>BMI kg/M<sup>2</sup></b>                                                 | 25.18 | 1.92  | 21.37 | 27.73 | 0.504  | 0.447 to 0.556   | <.0001 |
| <b>FPG mmol/L</b>                                                           | 4.78  | 0.24  | 4.03  | 5.17  | -0.214 | -0.282 to -0.143 | <.0001 |
| <b>LDLC mmol/L</b>                                                          | 2.79  | 0.12  | 2.33  | 3.09  | -0.106 | 0.177 to 0.034   | 0.0041 |
| <b>SBP mm Hg</b>                                                            | 131.7 | 4.20  | 126.8 | 141.6 | -0.258 | 0.325 to 0.189   | <.0001 |
| <b>Processed meat kcal/day</b>                                              | 28.27 | 14.81 | 3.98  | 68.77 | 0.576  | 0.525 to 0.622   | <.0001 |
| <b>Red meat kcal/day</b>                                                    | 104.1 | 44.09 | 41.43 | 207.8 | 0.715  | 0.677 to 0.748   | <.0001 |
| <b>Fish kcal/day</b>                                                        | 66.79 | 103.3 | 5.89  | 370.4 | -0.479 | 0.533 to 0.421   | <.0001 |
| <b>Milk kcal/day</b>                                                        | 66.62 | 28.54 | 25.35 | 103.9 | 0.451  | 0.391 to 0.507   | <.0001 |
| <b>Poultry kcal/day</b>                                                     | 136.4 | 59.04 | 43.47 | 190.9 | 0.402  | 0.339 to 0.460   | <.0001 |
| <b>Eggs kcal/day</b>                                                        | 42.73 | 6.86  | 27.43 | 69.64 | -0.363 | 0.424 to 0.298   | <.0001 |
| <b>Alcohol kcal/day</b>                                                     | 172.6 | 69.05 | 4.25  | 296.7 | 0.399  | 0.336 to 0.458   | <.0001 |
| <b>Sugary beverages kcal/day</b>                                            | 280.7 | 302.4 | 72.91 | 1472  | 0.160  | 0.089 to 0.230   | <.0001 |
| <b>Corn kcal/day</b>                                                        | 63.53 | 86.99 | 10.34 | 300.7 | 0.043  | 0.030 to 0.115   | 0.2477 |
| <b>potatoes kcal/day</b>                                                    | 79.60 | 36.62 | 18.09 | 147.4 | 0.360  | 0.295 to 0.421   | <.0001 |
| <b>SFA kcal/day</b>                                                         | 269.4 | 76.29 | 129.4 | 464.2 | 0.409  | 0.347 to 0.468   | <.0001 |
| <b>PUFA kcal/day</b>                                                        | 212.4 | 91.12 | 88.94 | 334.7 | 0.363  | 0.298 to 0.425   | <.0001 |
| <b>TFA kcal/day</b>                                                         | 38.34 | 20.36 | 6.49  | 76.54 | 0.257  | 0.187 to 0.323   | <.0001 |
| <b>Fruits kcal/day</b>                                                      | 62.54 | 12.78 | 31.67 | 86.50 | 0.132  | 0.060 to 0.203   | 0.0003 |
| <b>Vegetables kcal/day</b>                                                  | 113.1 | 37.27 | 49.16 | 224.9 | -0.214 | 0.282 to 0.144   | <.0001 |
| <b>Nuts and seeds kcal/day</b>                                              | 18.06 | 9.02  | 3.34  | 38.04 | 0.376  | 0.312 to 0.437   | <.0001 |
| <b>Whole grains kcal/day</b>                                                | 73.64 | 35.54 | 31.01 | 235.1 | -0.046 | 0.118 to 0.027   | 0.2184 |
| <b>Legumes kcal/day</b>                                                     | 49.56 | 20.88 | 14.93 | 86.31 | -0.244 | 0.311 to 0.174   | <.0001 |
| <b>Rice kcal/day</b>                                                        | 39.98 | 44.60 | 11.73 | 144.4 | -0.525 | 0.575 to 0.470   | <.0001 |
| <b>Sweet potatoes kcal/day</b>                                              | 4.58  | 4.13  | 0.52  | 12.12 | -0.489 | 0.542 to 0.421   | <.0001 |
| <b>Kcal /day available</b>                                                  | 3133  | 324   | 2456  | 3463  | 0.513  | 0.457 to 0.564   | <.0001 |
| <b>Vitamin A deficient children/100k/yr</b>                                 | 9705  | 6865  | 4319  | 28421 | -0.045 | 0.117 to 0.028   | 0.2246 |
| <b>Sodium g/day</b>                                                         | 4.11  | 1.18  | 2.34  | 6.70  | -0.390 | 0.450 to 0.326   | <.0001 |
| <b>Calcium g/day</b>                                                        | 0.59  | 0.16  | 0.30  | 0.86  | 0.487  | 0.429 to 0.540   | <.0001 |
| <b>Dietary fiber g/day</b>                                                  | 11.97 | 2.31  | 7.87  | 17.97 | -0.035 | 0.107 to 0.038   | 0.3447 |
| <b>Animal foods kcal /day</b>                                               | 444.9 | 115.2 | 159.8 | 701.4 | 0.214  | 0.144 to 0.282   | <.0001 |
| <b>Plant foods kcal/day</b>                                                 | 504.6 | 94.57 | 321.3 | 758.6 | -0.192 | 0.261 to 0.121   | <.0001 |
| <b>SFA+PUFA+TFA kcal/day</b>                                                | 520.1 | 172.3 | 257.3 | 828.0 | 0.404  | 0.341 to 0.463   | <.0001 |

537  
 538  
 539  
 540  
 541  
 542

543 **Table 6b NCD trend correlated with risk factor trends in USA, UK, Mexico, and Japan**

| <b>NCD trend versus risk factor trends: USA, UK, Mexico, and Japan (n combined=730 cohorts)</b> | <b>Mean</b> | <b>SD</b> | <b>Min</b> | <b>Max</b> | <b>r</b> | <b>95% CI</b>  | <b>p</b> |
|-------------------------------------------------------------------------------------------------|-------------|-----------|------------|------------|----------|----------------|----------|
| <b>NCD trend</b>                                                                                | -13.87      | 14.95     | -67.77     | 30.64      |          |                |          |
| <b>BMI kg/M<sup>2</sup> trend</b>                                                               | 0.069       | 0.026     | 0.007      | 0.116      | -0.105   | 0.176 to 0.032 | 0.0047   |
| <b>FPG mmol/L trend</b>                                                                         | 0.008       | 0.006     | -0.011     | 0.034      | 0.489    | 0.431 to 0.542 | <.0001   |
| <b>LDLC mmol/L trend</b>                                                                        | -0.008      | 0.011     | -0.022     | 0.009      | 0.512    | 0.456 to 0.564 | <.0001   |
| <b>SBP mm Hg trend</b>                                                                          | -0.140      | 0.127     | -0.475     | 0.250      | 0.209    | 0.138 to 0.277 | <.0001   |
| <b>Processed meat kcal/day trend</b>                                                            | 0.084       | 0.369     | -0.812     | 0.684      | 0.380    | 0.316 to 0.440 | <.0001   |
| <b>Red meat kcal/day trend</b>                                                                  | -0.300      | 0.943     | -2.94      | 2.66       | 0.493    | 0.436 to 0.546 | <.0001   |
| <b>Fish kcal/day trend</b>                                                                      | 1.529       | 2.795     | -0.028     | 9.790      | 0.371    | 0.306 to 0.432 | <.0001   |
| <b>Milk kcal/day trend</b>                                                                      | 0.220       | 0.280     | -0.438     | 1.012      | -0.242   | 0.309 to 0.173 | <.0001   |
| <b>Poultry kcal/day trend</b>                                                                   | 2.003       | 0.783     | 0.802      | 4.592      | 0.113    | 0.040 to 0.184 | 0.0023   |
| <b>Eggs kcal/day trend</b>                                                                      | 0.105       | 0.339     | -0.143     | 0.955      | 0.483    | 0.426 to 0.537 | <.0001   |
| <b>Alcohol kcal/day trend</b>                                                                   | 0.100       | 0.244     | -0.114     | 1.993      | -0.411   | 0.469 to 0.369 | <.0001   |
| <b>Sugary beverages kcal/day trend</b>                                                          | 0.878       | 2.88      | -5.40      | 14.00      | -0.023   | 0.096 to 0.049 | 0.5313   |
| <b>Corn kcal/day available trend</b>                                                            | -0.134      | 0.303     | -1.48      | 0.539      | -0.413   | 0.472 to 0.351 | <.0001   |
| <b>Potatoes kcal/day available trend</b>                                                        | -0.073      | 0.170     | -0.226     | 0.409      | 0.218    | 0.147 to 0.286 | <.0001   |
| <b>Saturated fatty acids trend</b>                                                              | 0.886       | 0.425     | -0.585     | 1.453      | 0.642    | 0.597 to 0.682 | <.0001   |
| <b>Poly unsaturated fatty acids trend</b>                                                       | 1.217       | 0.947     | -0.906     | 3.214      | -0.342   | 0.404 to 0.276 | <.0001   |
| <b>Trans fatty acids trend</b>                                                                  | -1.031      | 0.762     | -2.68      | -0.023     | -0.209   | 0.277 to 0.138 | <.0001   |
| <b>Fruits kcal/day trend</b>                                                                    | -0.138      | 0.383     | -1.43      | 1.06       | 0.239    | 0.169 to 0.306 | <.0001   |
| <b>Vegetables kcal/day trend</b>                                                                | 0.175       | 1.250     | -2.83      | 6.61       | 0.146    | 0.074 to 0.216 | <.0001   |
| <b>Nuts and seeds kcal/day trend</b>                                                            | 0.442       | 0.287     | 0.003      | 1.23       | -0.450   | 0.506 to 0.390 | <.0001   |
| <b>Whole grains kcal/day trend</b>                                                              | 0.306       | 1.433     | -1.07      | 8.46       | 0.195    | 0.124 to 0.264 | <.0001   |
| <b>Legumes kcal/day trend</b>                                                                   | -0.251      | 0.208     | -0.706     | 0.156      | -0.644   | 0.684 to 0.599 | <.0001   |
| <b>Rice kcal/day available trend</b>                                                            | -0.124      | 0.423     | -0.983     | 0.133      | -0.383   | 0.443 to 0.319 | <.0001   |
| <b>Sweet potatoes kcal/day available trend</b>                                                  | -0.002      | 0.030     | -0.057     | 0.022      | -0.357   | 0.419 to 0.219 | <.0001   |
| <b>Kcal available/day trend</b>                                                                 | 7.68        | 6.23      | -5.49      | 13.19      | -0.428   | 0.485 to 0.367 | <.0001   |
| <b>Vitamin A deficient children/100k/yr trend</b>                                               | -40.52      | 69.62     | -266.0     | 80.03      | -0.451   | 0.506 to 0.390 | <.0001   |
| <b>Sodium g/day trend</b>                                                                       | 0.008       | 0.044     | -0.106     | 0.051      | -0.404   | 0.463 to 0.341 | <.0001   |
| <b>Calcium g/day trend</b>                                                                      | 0.001       | 0.002     | -0.002     | 0.007      | 0.088    | 0.015 to 0.159 | 0.0176   |
| <b>Dietary fiber g/day trend</b>                                                                | 0.034       | 0.052     | -0.143     | 0.104      | -0.336   | 0.398 to 0.269 | <.0001   |

544

545

546 **Supplementary Table 1. Definitions of IHME GBD risk factors and covariates related to**

547 **BMI**

| <b>Variables</b>                   | <b>Definition</b>                                                                                                                                                                                                                                                                                                                |
|------------------------------------|----------------------------------------------------------------------------------------------------------------------------------------------------------------------------------------------------------------------------------------------------------------------------------------------------------------------------------|
| <b>Alcohol</b>                     | Any alcohol consumption (g/day)                                                                                                                                                                                                                                                                                                  |
| <b>Body-mass index</b>             | Body mass index (BMI) (kg/m <sup>2</sup> )—the dependent variable of interest                                                                                                                                                                                                                                                    |
| <b>Corn</b>                        | Corn availability percapita (g/day), a covariate                                                                                                                                                                                                                                                                                 |
| <b>Eggs</b>                        | Eggs availability percapita (g/day) a covariate                                                                                                                                                                                                                                                                                  |
| <b>Fasting plasma glucose</b>      | Fasting plasma glucose (mmol/L)                                                                                                                                                                                                                                                                                                  |
| <b>Fish</b>                        | This variable expressed in g/day is derived by determining the weight of fish in g corresponding to 1 g of omega-3 fatty acids (eicosapentaenoic acid and docosahexaenoic acid) by averaging the fish g per 1 g of omega-3 fatty acids 20 species of fish= 117.04 g/day fish/1 g/day omega-3 fatty acids (Supplementary Table 2) |
| <b>Fruits</b>                      | Consumption of fruits (includes fresh, frozen, cooked, canned, or dried fruit but excludes fruit juices and salted or pickled fruits) (g/day)                                                                                                                                                                                    |
| <b>Kilocalories available /day</b> | The mean number of kilocalories percapita available per day to people in each location (kcal/day available), a covariate                                                                                                                                                                                                         |
| <b>LDL cholesterol</b>             | Serum low-density lipoprotein cholesterol (mmol/L)                                                                                                                                                                                                                                                                               |
| <b>Legumes</b>                     | Consumption of beans, lentils, pulses (g/day)                                                                                                                                                                                                                                                                                    |
| <b>Milk</b>                        | Consumption of milk including non-fat, low-fat, and full-fat milk but excluding soy milk and other plant derivatives (g/day)                                                                                                                                                                                                     |
| <b>Nuts and seeds</b>              | Consumption of nuts and seeds (g/day)                                                                                                                                                                                                                                                                                            |
| <b>Poultry</b>                     | Poultry availability percapita (g/day), a covariate                                                                                                                                                                                                                                                                              |
| <b>Potatoes</b>                    | Potatoes availability percapita (g/day), a covariate                                                                                                                                                                                                                                                                             |
| <b>Processed meat</b>              | Consumption of any processed meat (includes meat preserved by smoking, curing, salting, or addition of chemical preservatives, including bacon, salami, sausages, or deli or luncheon meats like ham, turkey, and pastrami) (g/day)                                                                                              |
| <b>Red meat</b>                    | Consumption of red meat (includes beef, pork, lamb, and goat but excludes poultry, fish, eggs, and all processed meats) (g/day)                                                                                                                                                                                                  |
| <b>Rice</b>                        | Rice availability percapita (g/day), a covariate                                                                                                                                                                                                                                                                                 |
| <b>Seafood omega-3 fatty acids</b> | Seafood omega-3 fatty acids (eicosapentaenoic acid and docosahexaenoic acid) in tablet or fish form (g/day)                                                                                                                                                                                                                      |
| <b>Sugar-sweetened beverages</b>   | Consumption of any beverage with ≥50 calories of sugar per one-cup serving, including carbonated beverages, sodas, energy drinks, fruit drinks but excluding 100% fruit and vegetable juices (g/day)                                                                                                                             |
| <b>Sweet potatoes</b>              | Sweet potato availability percapita (g/day), a covariate                                                                                                                                                                                                                                                                         |
| <b>Systolic blood pressure</b>     | Systolic blood pressure (mm Hg)                                                                                                                                                                                                                                                                                                  |
| <b>Vegetables</b>                  | Consumption of frozen, cooked, canned, or dried vegetables (excluding legumes salted or pickled, juices, nuts and seeds, and starchy vegetables such as potatoes or corn) (g/day)                                                                                                                                                |
| <b>Whole grains</b>                | Consumption of whole grains (bran, germ, and endosperm in their natural proportions) from breakfast cereals, bread, rice, pasta, biscuits, muffins, tortillas, pancakes, and others (g/day)                                                                                                                                      |

548

549

550 **Supplementary Table 2. Omega-3 Fatty Acid g to fish g calculation¶¶**

| <b>Fish</b>                                                | <b>DHA g/3 ounce fish</b> | <b>EPA g/3 ounce fish</b> | <b>Omega-3 Fatty Acids (DHA + EPA) g/3 ounce fish mean</b> | <b>Fish 3 ounces = 85.02 g</b> | <b>Fish (g) per omega-3 Fatty Acids (g)=columns E/F</b> |
|------------------------------------------------------------|---------------------------|---------------------------|------------------------------------------------------------|--------------------------------|---------------------------------------------------------|
| <b>Salmon Atlantic farmed</b>                              | 1.24                      | 0.59                      |                                                            |                                |                                                         |
| <b>Salmon Atlantic wild</b>                                | 1.22                      | 0.35                      |                                                            |                                |                                                         |
| <b>Herring Atlantic</b>                                    | 0.94                      | 0.77                      |                                                            |                                |                                                         |
| <b>Sardines canned in tomato sauce drained</b>             | 0.74                      | 0.45                      |                                                            |                                |                                                         |
| <b>Mackerel Atlantic</b>                                   | 0.59                      | 0.43                      |                                                            |                                |                                                         |
| <b>Salmon pink canned drained</b>                          | 0.63                      | 0.28                      |                                                            |                                |                                                         |
| <b>Trout rainbow wild</b>                                  | 0.44                      | 0.40                      |                                                            |                                |                                                         |
| <b>Oysters eastern wild</b>                                | 0.23                      | 0.30                      |                                                            |                                |                                                         |
| <b>Sea bass</b>                                            | 0.47                      | 0.18                      |                                                            |                                |                                                         |
| <b>Shrimp</b>                                              | 0.12                      | 0.12                      |                                                            |                                |                                                         |
| <b>Lobster</b>                                             | 0.07                      | 0.10                      |                                                            |                                |                                                         |
| <b>Tuna light canned in water drained</b>                  | 0.17                      | 0.02                      |                                                            |                                |                                                         |
| <b>Tilapia</b>                                             | 0.11                      |                           |                                                            |                                |                                                         |
| <b>Scallops</b>                                            | 0.09                      | 0.06                      |                                                            |                                |                                                         |
| <b>Cod Pacific</b>                                         | 0.1                       | 0.04                      |                                                            |                                |                                                         |
| <b>Tuna yellowfin</b>                                      | 0.09                      | 0.01                      |                                                            |                                |                                                         |
| <b>Mean DHA and EPA Omega-3 Fatty Acids g/3 ounce fish</b> | 0.4531                    | 0.2733                    |                                                            |                                |                                                         |
| <b>Calculations total Omega-3 FA g to fish g</b>           |                           |                           | 0.7264                                                     | 85.02                          | 117.043                                                 |

551 ¶¶ Data on omega-3 fatty acid content of varieties of fish came from the National Institutes of  
 552 Health Office of Dietary Supplements (USA)

553

554

555

556 **Supplementary Table 3. Calculations of kcal/day from g/day of animal and plant foods¶**

| <b>Foods</b>                     | <b>Food sub-categories</b> | <b>kcal/serving</b> | <b>g/serving</b> | <b>kcal/g</b> |
|----------------------------------|----------------------------|---------------------|------------------|---------------|
| <b>Milk (2% fat)</b>             |                            | 122                 | 244              | 0.5           |
| <b>Fish</b>                      |                            | 218                 | 170              | 1.28          |
| <b>Eggs</b>                      |                            | 72                  | 50               | 1.44          |
| <b>Poultry</b>                   |                            | 187                 | 85               | 2.91          |
| <b>Red meat</b>                  |                            | 247                 | 85               | 2.91          |
| <b>Processed meat</b>            |                            |                     |                  |               |
|                                  | <b>Salami</b>              | 222                 | 59               | 3.76          |
|                                  | <b>Pastrami</b>            | 104                 | 71               | 1.46          |
|                                  | <b>Ring baloney</b>        | 86                  | 28               | 3.07          |
|                                  | <b>Pepperoni</b>           | 94                  | 100              | 0.94          |
| <b>Average processed meat</b>    |                            | 126.5               | 64.5             | 1.96          |
| <b>Fruits</b>                    |                            | 97                  | 162              | 0.60          |
| <b>Vegetables</b>                |                            | 59                  | 91               | 0.65          |
| <b>Legumes</b>                   |                            | 249                 | 179              | 1.39          |
| <b>Nuts</b>                      |                            | 172                 | 28               | 6.14          |
| <b>Seeds</b>                     |                            |                     |                  |               |
|                                  | <b>Flax seeds</b>          | 55                  | 10               | 5.5           |
|                                  | <b>Chia seeds</b>          | 58                  | 12               | 4.83          |
|                                  | <b>Fennel seeds</b>        | 34.5                | 10               | 3.45          |
|                                  | <b>Hemp seeds</b>          | 55.3                | 10               | 5.53          |
| <b>Average of seeds</b>          |                            | 50.7                | 10.5             | 4.83          |
| <b>Average of nuts and seeds</b> |                            | 111.4               | 19.25            | 5.78          |
| <b>Corn</b>                      |                            | 99                  | 103              | 0.96          |
| <b>Potatoes</b>                  |                            | 161                 | 173              | 0.93          |
| <b>Sweet potatoes</b>            |                            | 115                 | 151              | 0.76          |
| <b>Rice</b>                      |                            | 205                 | 158              | 1.3           |
| <b>Whole grains</b>              |                            | 120                 | 52               | 2.31          |

557 ¶ Source: NutritionIX app

558

559

## 560 **Acknowledgments**

561• **Authors' contributions:** DKC acts as guarantor; conceived and designed the study, acquired  
562 and analysed the data, interpreted the study findings, drafted the manuscript, critically reviewed  
563 and edited the manuscript and tables, and approved the final version for publication.

564

565 CW designed software programs in R to format and population weight the data,  
566 aided with the SAS statistical analysis, critically reviewed the manuscript, and  
567 approved the final version for publication.

568

569 The corresponding author attests that all listed authors meet authorship criteria and that no others  
570 meeting the criteria have been omitted.

571

572 **Copyright:** The authors retain the copyright to the paper

573

574 The Patient and Public Involvement

575 • When and how were patients/public first involved in the research?

576 IHME acquired, catalogued and extracted information from over 12,000 surveys from  
577 government and non government agencies in order to compile the GBD database.

578 • How were the research question(s) developed and informed by their priorities,  
579 experience, and preferences?

580 The diverse surveys contributing to the GBD database had many different priorities and

581 intentions unrelated to this post hoc analysis. The current analysis research questions have been

582 developed to give researchers, policymakers, and the public the methodological tool to quantify  
583 the impacts of dietary and other risk factor patterns.

584 • How were patients/public involved in

585 (a) the design and conduct of the study?

586 The way patients/public were involved in the collection of the surveys has not been  
587 systematically studied and reported on. Patients/public are the intended beneficiaries of  
588 this analysis of the GBD data.

589 (b) choice of outcome measures?

590 The outcome measures chosen all relate to human health.

591 (c) recruitment to the study?

592 The recruitment methods vary by the survey.

593 • How were (or will) patients/ public be involved in choosing the methods and agreeing  
594 plans for dissemination of the study results to participants and linked communities?

595 IHME and all the health surveyors that contributed will make these decisions. This analysis of  
596 the data will be available to all by open access.

597

598• **Competing interests statement:** Both authors have completed the ICMJE uniform disclosure  
599 form at [www.icmje.org/coi\\_disclosure.pdf](http://www.icmje.org/coi_disclosure.pdf) and declare: no support from any organisation for the  
600 submitted work; no financial relationships with any organisations that might have an interest in  
601 the submitted work in the previous three years; no other relationships or activities that could  
602 appear to have influenced the submitted work.

603

604 **Contributors:** Martin Sebera, from the Department of Kinesiology, Faculty of Sports Studies

605 Masaryk University, Czech Republic, critiqued statistical aspects of the manuscript and provided  
606 useful input. Pavel Grasgruber, from Masaryk University, Czech Republic, provided suggestions  
607 after reviewing the manuscript.

608

609 **Transparency declaration:** The manuscript is an honest, accurate, and transparent account of  
610 the study being reported; that no important aspects of the study have been omitted; and that any  
611 discrepancies from the study as planned have been explained.

612

613 **Ethics:** Studies based solely on data from IHME GBD database do not need approval from any  
614 bioethics committee.

615

616• **Funding:** This research received no specific grant from any funding agency in the public,  
617 commercial or not-for-profit sectors. The Bill and Melinda Gates Foundation funded the  
618 acquisition of the data for this analysis by the IHME. The data were provided to the authors as  
619 volunteer collaborators with IHME.

620•

621  
622 **Details of the role of the study sponsors:** While IHME GBD faculty and staff by virtue of  
623 Gates Foundation grants provided the raw data for this analysis, they did not vet the analysis or  
624 sponsor the manuscript.

625

626 **Statement of independence of researchers from funders:** The researchers have received no  
627 funding. Gates Foundation funded IHME to collect and analyse the GBD data.



628 **Dissemination declaration:** Dissemination of this manuscript to the participants of the more  
629 than 12,000 surveys is not possible individually, but the information will become in the public  
630 domain.

631  
632 **Disclosures:** We thank Scott Glenn and Brent Bell from IHME who supplied us with the GBD  
633 risk factor exposure data for the risk factors and for noncommunicable disease death data.

634•  
635 **Ethics:** Studies were based solely on data from the IHME GBD database and do not need  
636 approval from any bioethics committee.

637  
638 **Participant informed consents:** Not applicable.

639  
640 **Author access to data:** As volunteer collaborators with the Institute of Health Metrics and  
641 Evaluation, we received about 1.4 gigabytes of raw data on noncommunicable disease deaths and  
642 32 relevant risk factors.

643  
644 **Data sharing statement:** The raw, unformatted data used in this analysis is now out of date. The  
645 2019 GBD data on all the variables in this analysis may be obtained from the IHME by volunteer  
646 collaborating researchers. Our data formatting software code in R and SAS and our formatted  
647 database are available on request to researchers.

648  
649 **Protocol, submitted as a supplementary file:** Not applicable.

650

651 **STROBE checklist:** Submitted.

652

653 **Patient consent:** Not applicable.

654

655

## 656 **References**

- 657 1. Murray CJL, Aravkin AY, Zheng P, et al. **Global burden of 87 risk factors in 204**  
658 **countries and territories, 1990-2019: a systematic analysis for the Global Burden of**  
659 **Disease Study 2019.** *The Lancet.* 2020; **396** (10258): 1223-1249.  
660 [https://www.thelancet.com/journals/lancet/article/PIIS0140-6736\(20\)30752-2/fulltext](https://www.thelancet.com/journals/lancet/article/PIIS0140-6736(20)30752-2/fulltext)
- 661 2. Global Burden of Disease Study 2017 (GBD 2017) Data Input Sources Tool. Seattle,  
662 Washington: Institute of Health Metrics and Evaluation Accessed August 10, 2019.  
663 <http://ghdx.healthdata.org/gbd-2017/data-input-sources>
- 664 3. **GBD 2017 Risk Factor Collaborators. Global, regional, and national comparative**  
665 **risk assessment of 84 behavioural, environmental and occupational, and metabolic**  
666 **risks or clusters of risks for 195 countries and territories, 1990–2017: a systematic**  
667 **analysis for the Global Burden of Disease Study 2017: Table of risk factor**  
668 **definitions.** *The Lancet.* 2018; **392** (10159): 1923-94.  
669 [https://www.thelancet.com/action/showFullTableHTML?isHtml=true&tableId=tbl1&pii=](https://www.thelancet.com/action/showFullTableHTML?isHtml=true&tableId=tbl1&pii=S0140-6736%2818%2932225-6)  
670 [S0140-6736%2818%2932225-6](https://www.thelancet.com/action/showFullTableHTML?isHtml=true&tableId=tbl1&pii=S0140-6736%2818%2932225-6)
- 671 4. PROTOCOL FOR THE GLOBAL BURDEN OF DISEASES, INJURIES, AND RISK  
672 FACTORS STUDY (GBD) Version 3.0; Issue 26. Seattle, Washington: Institute for  
673 Health Metrics and Evaluation Accessed August 2, 2019.  
674 [http://www.healthdata.org/sites/default/files/files/Projects/GBD/GBD\\_Protocol.pdf](http://www.healthdata.org/sites/default/files/files/Projects/GBD/GBD_Protocol.pdf)
- 675 5. Naghavi M, Abajobir AA, Abbafati C, et al. **Global, regional, and national age-sex**  
676 **specific mortality for 264 causes of death, 1980–2016: a systematic analysis for the**  
677 **Global Burden of Disease Study 2016.** *The Lancet.* 2017; **390** (10100): 1151-1210.  
678 [https://doi.org/10.1016/S0140-6736\(17\)32152-9](https://doi.org/10.1016/S0140-6736(17)32152-9)

- 679 6. Flaxman AD, Lee YY, Vos T, et al. An Integrative Metaregression Framework for  
680 Descriptive Epidemiology. Seattle, WA: University of Washington Press, 2015.
- 681 7. GBD 2017 Risk Factor Collaborators. **Global, regional, and national comparative risk  
682 assessment of 84 behavioural, environmental and occupational, and metabolic risks  
683 or clusters of risks for 195 countries and territories, 1990–2017: a systematic  
684 analysis for the Global Burden of Disease Study 2017.** . *The Lancet*. 2018; **392**  
685 (10159): 1923-94. [https://doi.org/10.1016/S0140-6736\(18\)32225-6](https://doi.org/10.1016/S0140-6736(18)32225-6)
- 686 8. Call for Collaborators. . Seattle, Washington: Institute for Health Metrics and Evaluation  
687 at the University of Washington 2019; Accessed April 25, 2019.  
688 <http://www.healthdata.org/gbd/call-for-collaborators>
- 689 9. Stevens GA, Alkema L, Black PRE, et al. **Guidelines for Accurate and Transparent  
690 Health Estimates Reporting: the GATHER statement.** *The Lancet*. 2016; **388**  
691 (10062): e19-e23. [https://doi.org/10.1016/S0140-6736\(16\)30388-9](https://doi.org/10.1016/S0140-6736(16)30388-9)
- 692 10. Omega 3 Fatty Acids: Fact Sheet for Health Professionals. The Office of Dietary  
693 Supplements 2018; Accessed September 1, 2018.  
694 <https://ods.od.nih.gov/factsheets/Omega3FattyAcids-HealthProfessional/>
- 695 11. Nutritionix Track App. Syndigo LLC Accessed April 25, 2019.  
696 <https://www.nutritionix.com/>
- 697 12. Mexico: profiled by the IHME GBD project. Seattle, Washington: Institute of Health  
698 Metrics and Evaluation, University of Washington Accessed November 25, 2020.  
699 <http://www.healthdata.org/mexico>
- 700 13. Flegal KM, Kit BK, Orpana H, Graubard BI. **Association of All-Cause Mortality With  
701 Overweight and Obesity Using Standard Body Mass Index Categories: A Systematic**

- 702           **Review and Meta-analysis.** *JAMA*. 2013; **309** (1): 71-82.
- 703           <https://doi.org/10.1001/jama.2012.113905>
- 704   14.     Aune D, Sen A, Prasad M, et al. **BMI and all cause mortality: systematic review and**
- 705           **non-linear dose-response meta-analysis of 230 cohort studies with 3.74 million**
- 706           **deaths among 30.3 million participants.** *BMJ*. 2016; **353**: i2156.
- 707           <https://www.bmj.com/content/bmj/353/bmj.i2156.full.pdf>
- 708   15.     Jayedi A, Rashidy-Pour A, Parohan M, Zargar MS, Shab-Bidar S. **Dietary and**
- 709           **circulating vitamin C, vitamin E,  $\beta$ -carotene and risk of total cardiovascular**
- 710           **mortality: a systematic review and dose–response meta-analysis of prospective**
- 711           **observational studies.** *Public Health Nutrition*. 2019; **22** (10): 1872-1887.
- 712           [https://www.cambridge.org/core/article/dietary-and-circulating-vitamin-c-vitamin-e-](https://www.cambridge.org/core/article/dietary-and-circulating-vitamin-c-vitamin-e-carotene-and-risk-of-total-cardiovascular-mortality-a-systematic-review-and-doseresponse-metaanalysis-of-prospective-observational-studies/71D0B7C4B76F03C3E8FB00A4925551F0)
- 713           [carotene-and-risk-of-total-cardiovascular-mortality-a-systematic-review-and-](https://www.cambridge.org/core/article/dietary-and-circulating-vitamin-c-vitamin-e-carotene-and-risk-of-total-cardiovascular-mortality-a-systematic-review-and-doseresponse-metaanalysis-of-prospective-observational-studies/71D0B7C4B76F03C3E8FB00A4925551F0)
- 714           [doseresponse-metaanalysis-of-prospective-observational-](https://www.cambridge.org/core/article/dietary-and-circulating-vitamin-c-vitamin-e-carotene-and-risk-of-total-cardiovascular-mortality-a-systematic-review-and-doseresponse-metaanalysis-of-prospective-observational-studies/71D0B7C4B76F03C3E8FB00A4925551F0)
- 715           [studies/71D0B7C4B76F03C3E8FB00A4925551F0](https://www.cambridge.org/core/article/dietary-and-circulating-vitamin-c-vitamin-e-carotene-and-risk-of-total-cardiovascular-mortality-a-systematic-review-and-doseresponse-metaanalysis-of-prospective-observational-studies/71D0B7C4B76F03C3E8FB00A4925551F0)
- 716   16.     Wang L, Song Y, Manson JE, et al. **Circulating 25-Hydroxy-Vitamin D and Risk of**
- 717           **Cardiovascular Disease: A Meta-Analysis of Prospective Studies.** *Circulation:*
- 718           *Cardiovascular Quality and Outcomes*. 2012; **5** (6): 819-829.
- 719           <http://circoutcomes.ahajournals.org/content/5/6/819.abstract>
- 720   17.     Beulens JWJ, Booth SL, van den Heuvel EGHM, Stoecklin E, Baka A, Vermeer C. **The**
- 721           **role of menaquinones (vitamin K2) in human health.** *British Journal of Nutrition*.
- 722           2013; **110**: 1357–1368. [https://www.cambridge.org/core/journals/british-journal-of-](https://www.cambridge.org/core/journals/british-journal-of-nutrition/article/the-role-of-menaquinones-vitamin-k2-in-human-health/5B9F317B526629D8BA77B6435F1E5509)
- 723           [nutrition/article/the-role-of-menaquinones-vitamin-k2-in-human-](https://www.cambridge.org/core/journals/british-journal-of-nutrition/article/the-role-of-menaquinones-vitamin-k2-in-human-health/5B9F317B526629D8BA77B6435F1E5509)
- 724           [health/5B9F317B526629D8BA77B6435F1E5509](https://www.cambridge.org/core/journals/british-journal-of-nutrition/article/the-role-of-menaquinones-vitamin-k2-in-human-health/5B9F317B526629D8BA77B6435F1E5509)

- 725 18. Clemens R, Drewnowski A, Ferruzzi MG, Toner CD, Welland D. **Squeezing fact from**  
726 **fiction about 100% fruit juice.** *Advances in nutrition (Bethesda, Md.)*. 2015; **6** (2):  
727 236S-243S. <https://www.ncbi.nlm.nih.gov/pmc/articles/PMC4352186/>
- 728 19. POTATO PROCESSING AND USES. Lima, Peru: International Potato Center  
729 Accessed May 28, 2020. <https://cipotato.org/potato/potato-processing-uses/>
- 730 20. Amount of Saturated Fat in Potatoes. Diet and Fitness Today Accessed July 10, 2020.  
731 <http://www.dietandfitnesstoday.com/saturated-fat-in-potatoes.php>
- 732
- 733
